# Supplementary material for: Genetic Modifiers of Sickle Cell Anemia Phenotype in a Cohort of Angolan Children
Source: MDPI journal article supplement (doi:10.3390/genes15040469), 2024-04-08
Supplement: s1 [file s1]

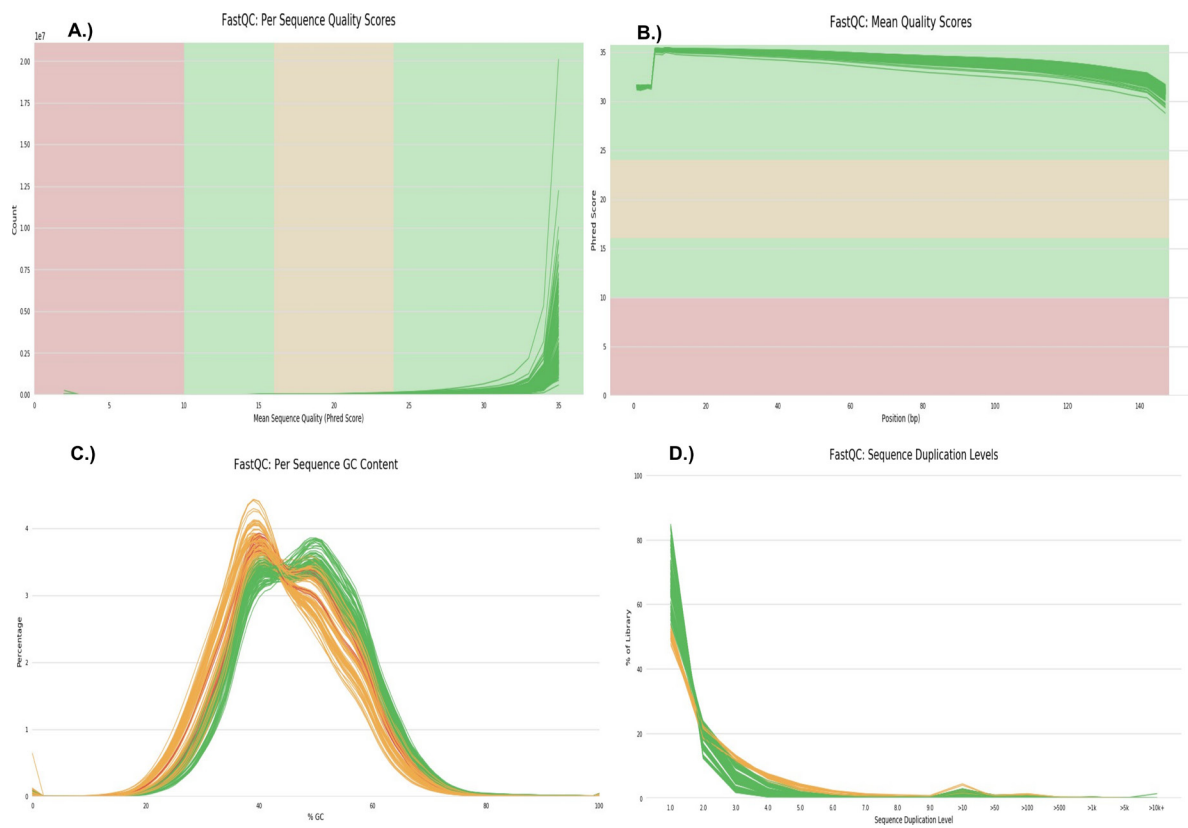

Figure S1

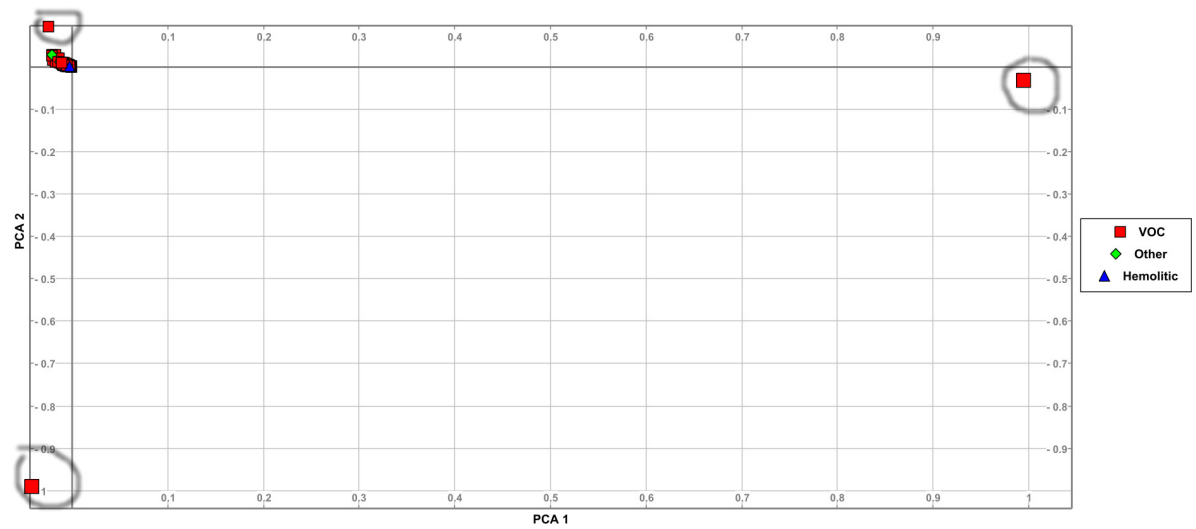

Figure S2

- B cell activation
- lymphocyte proliferation
- leukocyte proliferation
- antigen receptor-mediated signaling pathway

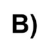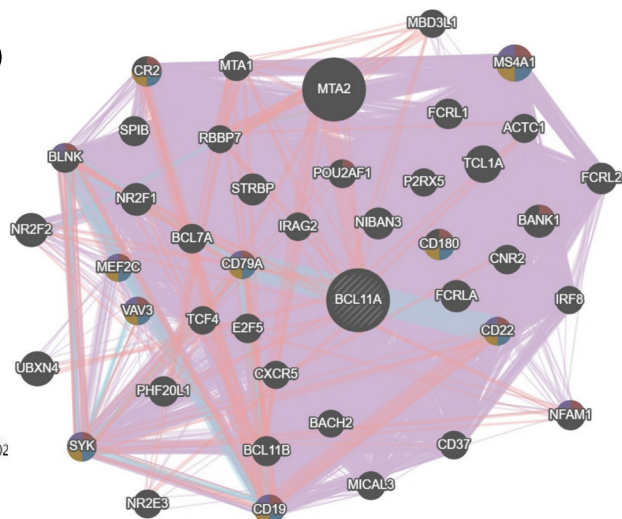

- Physical Interactions
- Co-expression
- Pathway

**Figure S3**

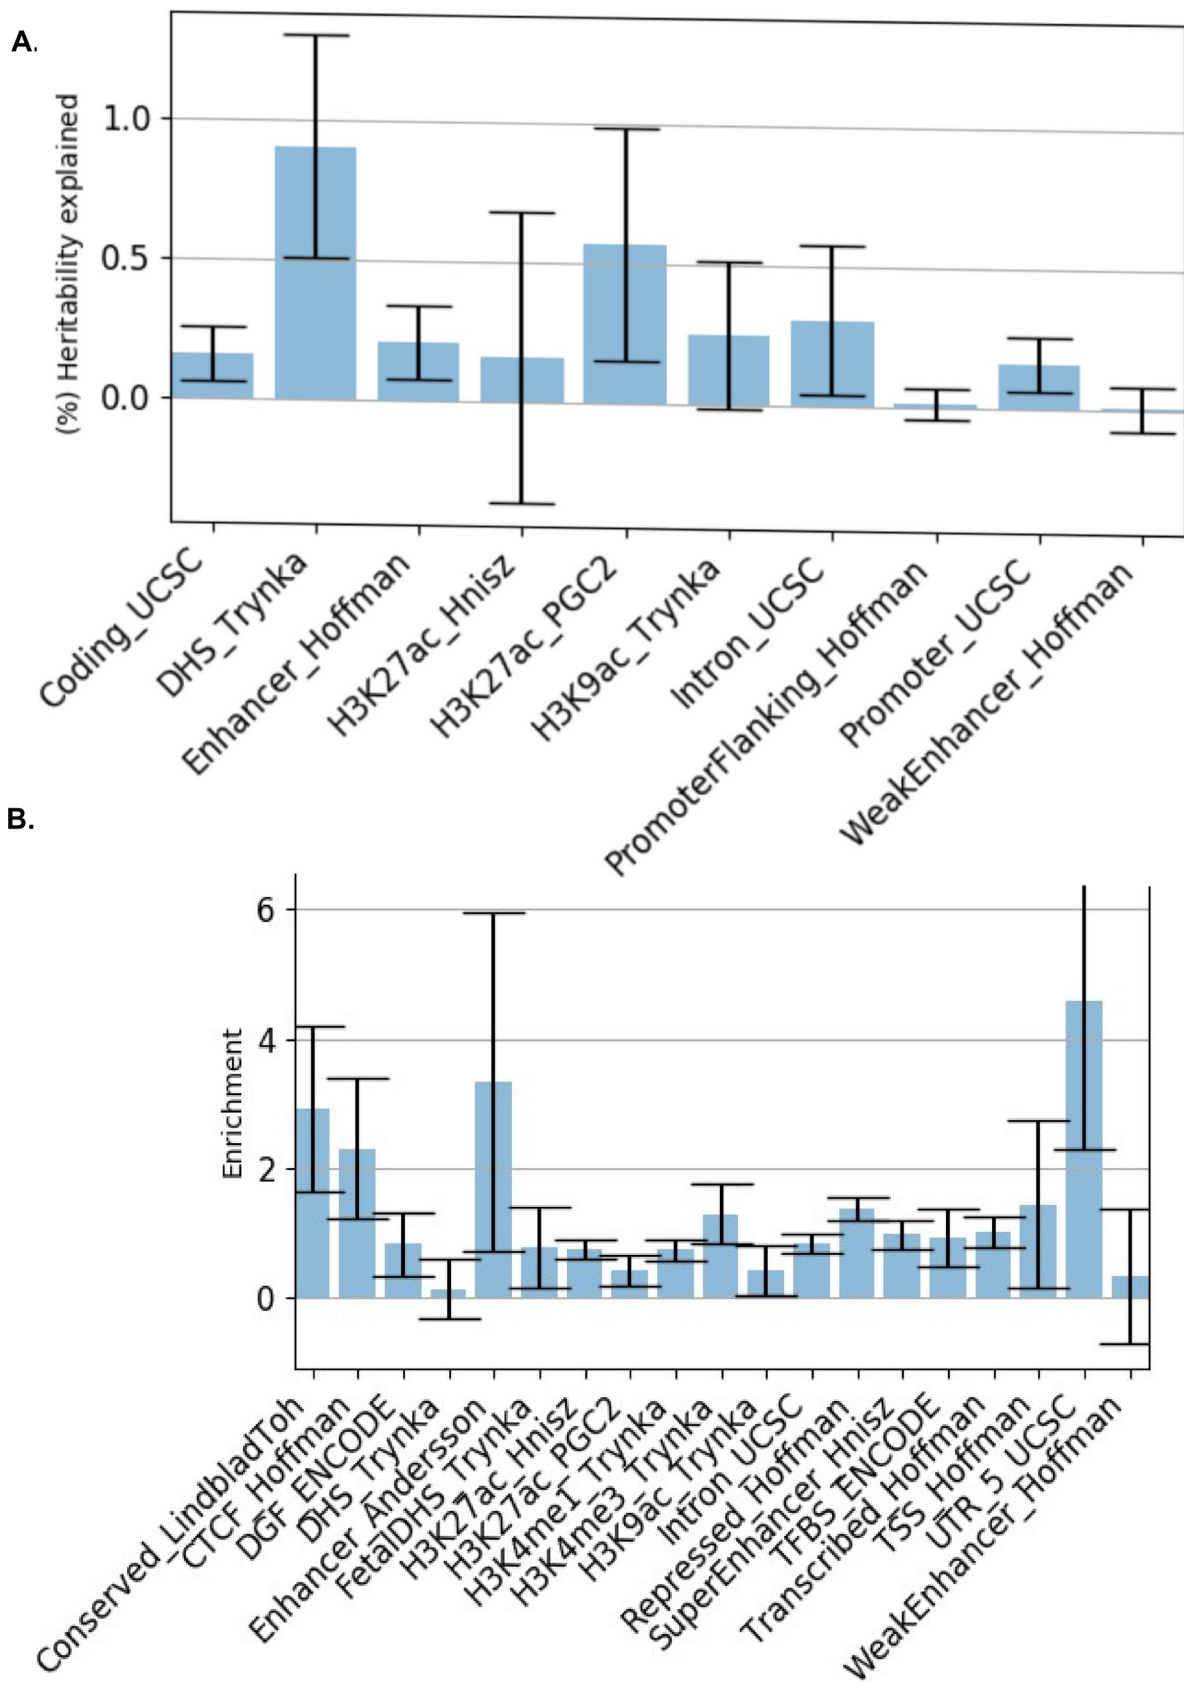

Figure S4
