# Supplementary material for: Genetic Modifiers of Sickle Cell Anemia Phenotype in a Cohort of Angolan Children
Source: MDPI journal article supplement (doi:10.3390/genes15040469), 2024-04-08
Supplement: s1 [file s1]

**Supplementary Table S1A.** Custom enrichment panel of targeting regions based on which 192 study sickle cell patients from Angola were sequenced.

| Location                       | Chromosome | start     | end       |
|--------------------------------|------------|-----------|-----------|
| HBB cluster LCR 1              | chr11      | 5225101   | 5275401   |
| HBB cluster LCR 2              | chr11      | 5275201   | 5325416   |
| BCL11A 1                       | chr2       | 60678502  | 60729633  |
| BCL11A 2                       | chr2       | 60729433  | 60780833  |
| HMIP 2b intergenic HBS1L MYB 1 | chr6       | 135281516 | 135367916 |
| HMIP 2b intergenic HBS1L MYB 2 | chr6       | 135367716 | 135454116 |
| HMIP 2b intergenic HBS1L MYB 2 | chr6       | 135452116 | 135540311 |
| KLF1                           | chr19      | 12995036  | 12998217  |
| Fox3 exon1b                    | chr6       | 108881018 | 108881238 |
| Fox3 exon1                     | chr6       | 108882069 | 108883052 |
| Fox3 exon2                     | chr6       | 108984638 | 108986122 |
| Fox3 exon3                     | chr6       | 109001000 | 109006000 |
| Fox3 exon1c                    | chr6       | 108977539 | 108977751 |
| ZBTB7A exon1a CpG              | chr19      | 4066660   | 4067442   |
| ZBTB7A exon 1b                 | chr19      | 4065428   | 4065730   |
| ZBTB7A exon 2                  | chr19      | 4053949   | 4055265   |
| ZBTB7A exon 3                  | chr19      | 4044362   | 4048282   |
| HBa1 HBa2                      | chr16      | 170847    | 178542    |
| rs2342395                      | chr7       | 45975165  | 45975265  |
| rs2965073                      | chr7       | 45981073  | 45981173  |
| rs3111314                      | chr7       | 45981488  | 45981588  |
| rs1525819                      | chr7       | 45984850  | 45984950  |
| rs113143441                    | chr7       | 45987480  | 45987580  |
| rs62456326                     | chr7       | 45987874  | 45987974  |
| rs2462328                      | chr7       | 45992732  | 45992832  |
| rs1722148                      | chr7       | 45993446  | 45993546  |
| rs788766                       | chr7       | 45997493  | 45997593  |
| rs788768                       | chr7       | 46000504  | 46000604  |
| rs1404160                      | chr7       | 46014766  | 46014866  |

**Supplementary Table S1B.** Count and proportion of pathogenic variants of the identified 26 mutant genes in 192 SCA Angolan samples.

| CHR | Gene            | Band   | #Pathogenic SNPs | #SNPs | % Pathogenic |
|-----|-----------------|--------|------------------|-------|--------------|
| 6   | <i>COL11A2</i>  | p21.32 | 30               | 274   | 10,95        |
| 11  | <i>DHCR7</i>    | q13.4  | 11               | 181   | 6,08         |
| 7   | <i>CLCN1</i>    | q34    | 15               | 255   | 5,88         |
| 11  | <i>LRP4</i>     | p11.2  | 26               | 340   | 7,65         |
| 11  | <i>PIDD1</i>    | p15.5  | 22               | 68    | 32,35        |
| 7   | <i>ABCF2</i>    | q36.1  | 11               | 155   | 7,1          |
| 11  | <i>TPP1</i>     | p15.4  | 15               | 57    | 26,32        |
| 11  | <i>DCHS1</i>    | p15.4  | 22               | 336   | 6,55         |
| 2   | <i>SNRNP200</i> | q11.2  | 10               | 171   | 5,85         |
| 11  | <i>NDUFV1</i>   | q13.2  | 10               | 53    | 18,87        |
| 6   | <i>ITPR3</i>    | p21.31 | 51               | 757   | 6,74         |
| 11  | <i>ACAD8</i>    | q25    | 10               | 161   | 6,21         |
| 7   | <i>FLNC</i>     | q32.1  | 29               | 255   | 11,37        |
| 7   | <i>GIGYF1</i>   | q22.1  | 15               | 157   | 9,55         |
| 7   | <i>SLC4A2</i>   | q36.1  | 23               | 144   | 15,97        |
| 6   | <i>EHMT2</i>    | p21.33 | 16               | 99    | 16,16        |
| 2   | <i>ALPP</i>     | q37.1  | 17               | 324   | 5,25         |
| 7   | <i>PSPH</i>     | p11.2  | 30               | 354   | 8,47         |
| 7   | <i>PRSS1</i>    | q34    | 103              | 1571  | 6,56         |
| 11  | <i>PYGM</i>     | q13.1  | 12               | 95    | 12,63        |
| 11  | <i>ACCS</i>     | p11.2  | 13               | 220   | 5,91         |
| 2   | <i>CAD</i>      | p23.3  | 14               | 179   | 7,82         |
| 11  | <i>TCIRG1</i>   | q13.2  | 13               | 79    | 16,46        |
| 7   | <i>ABCB8</i>    | q36.1  | 20               | 138   | 14,49        |
| 6   | <i>NOTCH4</i>   | p21.32 | 32               | 563   | 5,68         |
| 11  | <i>NDUFS8</i>   | q13.2  | 10               | 51    | 19,61        |

**Supplementary Table S1C.** Genes with high burdens of deleterious and loss-of-function mutations in 192 SCA patients from Angola.

| CHROM | POS       | A1/A2 | Gene     | Region | FuncGene | ExonicFunc        |
|-------|-----------|-------|----------|--------|----------|-------------------|
| chr2  | 27446459  | T/A   | CAD      | p23.3  | exonic   | nonsynonymous_SNV |
| chr2  | 27454368  | G/A   | CAD      | p23.3  | exonic   | nonsynonymous_SNV |
| chr2  | 27454944  | G/A   | CAD      | p23.3  | exonic   | nonsynonymous_SNV |
| chr2  | 27456571  | G/A   | CAD      | p23.3  | exonic   | nonsynonymous_SNV |
| chr2  | 27458218  | G/A   | CAD      | p23.3  | exonic   | nonsynonymous_SNV |
| chr2  | 27464801  | T/A   | CAD      | p23.3  | exonic   | nonsynonymous_SNV |
| chr2  | 96949340  | G/A   | SNRNP200 | q11.2  | exonic   | nonsynonymous_SNV |
| chr2  | 233245351 | A/T   | ALPP     | q37.1  | exonic   | nonsynonymous_SNV |
| chr6  | 31848610  | A/G   | EHMT2    | p21.33 | exonic   | nonsynonymous_SNV |
| chr6  | 32166740  | G/A   | NOTCH4   | p21.32 | exonic   | nonsynonymous_SNV |
| chr6  | 32184972  | A/T   | NOTCH4   | p21.32 | exonic   | nonsynonymous_SNV |
| chr6  | 33136301  | T/C   | COL11A2  | p21.32 | exonic   | nonsynonymous_SNV |
| chr6  | 33626532  | T/C   | ITPR3    | p21.31 | exonic   | nonsynonymous_SNV |
| chr6  | 33627323  | A/T   | ITPR3    | p21.31 | exonic   | nonsynonymous_SNV |
| chr6  | 33635033  | T/C   | ITPR3    | p21.31 | exonic   | nonsynonymous_SNV |
| chr6  | 33643517  | C/A   | ITPR3    | p21.31 | exonic   | nonsynonymous_SNV |
| chr7  | 56087374  | C/T   | PSPH     | p11.2  | exonic   | nonsynonymous_SNV |
| chr7  | 100282107 | G/A   | GIGYF1   | q22.1  | exonic   | nonsynonymous_SNV |
| chr7  | 128483007 | A/G   | FLNC     | q32.1  | exonic   | nonsynonymous_SNV |
| chr7  | 128484831 | G/T   | FLNC     | q32.1  | exonic   | nonsynonymous_SNV |
| chr7  | 128484859 | G/C   | FLNC     | q32.1  | exonic   | nonsynonymous_SNV |
| chr7  | 128486137 | C/T   | FLNC     | q32.1  | exonic   | nonsynonymous_SNV |
| chr7  | 128490971 | T/A   | FLNC     | q32.1  | exonic   | nonsynonymous_SNV |
| chr7  | 128493883 | A/C   | FLNC     | q32.1  | exonic   | nonsynonymous_SNV |
| chr7  | 142458511 | G/T   | PRSS1    | q34    | exonic   | nonsynonymous_SNV |
| chr7  | 142458523 | T/A   | PRSS1    | q34    | exonic   | nonsynonymous_SNV |
| chr7  | 142460339 | G/A   | PRSS1    | q34    | exonic   | nonsynonymous_SNV |
| chr7  | 142460374 | A/G   | PRSS1    | q34    | exonic   | nonsynonymous_SNV |
| chr7  | 143027877 | G/A   | CLCN1    | q34    | exonic   | nonsynonymous_SNV |
| chr7  | 150731652 | G/T   | ABCB8    | q36.1  | exonic   | nonsynonymous_SNV |
| chr7  | 150738291 | G/A   | ABCB8    | q36.1  | exonic   | nonsynonymous_SNV |
| chr7  | 150768572 | C/T   | SLC4A2   | q36.1  | exonic   | nonsynonymous_SNV |
| chr7  | 150772851 | T/C   | SLC4A2   | q36.1  | exonic   | nonsynonymous_SNV |
| chr7  | 150915925 | T/G   | ABCF2    | q36.1  | exonic   | nonsynonymous_SNV |
| chr11 | 799869    | G/A   | PIDD1    | p15.5  | exonic   | nonsynonymous_SNV |
| chr11 | 6636711   | C/T   | TPP1     | p15.4  | exonic   | nonsynonymous_SNV |
| chr11 | 6661676   | A/G,T | DCHS1    | p15.4  | DCHS1    | exonic            |
| chr11 | 44099444  | A/T   | ACCS     | p11.2  | exonic   | nonsynonymous_SNV |
| chr11 | 46880727  | C/T   | LRP4     | p11.2  | exonic   | nonsynonymous_SNV |
| chr11 | 46905461  | A/T   | LRP4     | p11.2  | exonic   | nonsynonymous_SNV |
| chr11 | 46920139  | A/G   | LRP4     | p11.2  | exonic   | nonsynonymous_SNV |
| chr11 | 46921459  | A/G   | LRP4     | p11.2  | exonic   | nonsynonymous_SNV |
| chr11 | 64519479  | G/A   | PYGM     | q13.1  | exonic   | nonsynonymous_SNV |
| chr11 | 64520657  | A/T   | PYGM     | q13.1  | exonic   | nonsynonymous_SNV |
| chr11 | 64526116  | T/G   | PYGM     | q13.1  | exonic   | nonsynonymous_SNV |
| chr11 | 67379861  | C/T   | NDUFV1   | q13.2  | exonic   | nonsynonymous_SNV |
| chr11 | 67803739  | A/C   | NDUFS8   | q13.2  | exonic   | nonsynonymous_SNV |
| chr11 | 67812434  | G/A   | TCIRG1   | q13.2  | exonic   | nonsynonymous_SNV |
| chr11 | 71148958  | T/C   | DHCR7    | q13.4  | exonic   | nonsynonymous_SNV |
| chr11 | 134127145 | T/G   | ACAD8    | q25    | exonic   | nonsynonymous_SNV |
| chr11 | 134128410 | A/G   | ACAD8    | q25    | exonic   | nonsynonymous_SNV |
| chr11 | 134128969 | T/A   | ACAD8    | q25    | exonic   | nonsynonymous_SNV |
