# Supplementary material for: Genetic Modifiers of Sickle Cell Anemia Phenotype in a Cohort of Angolan Children
Source: MDPI journal article supplement (doi:10.3390/genes15040469), 2024-04-08
Supplement: s1 [file s1]

**Supplementary Table S2.** Data obtained from 1000 Genomes Project (1KGP) (Consortium et al., 2012) and the African Genome Variation Project (AGVP) (Gurdasani et al., 2015) and used for analysis.

| Population label | Ethnic group            | Population description                                                                                                                                                                                          | Total Samples |
|------------------|-------------------------|-----------------------------------------------------------------------------------------------------------------------------------------------------------------------------------------------------------------|---------------|
| AFR              | Afro-Asiatic Semitic    | Amhara:Ethiopia                                                                                                                                                                                                 | 22            |
|                  | African-American        | Americans of African Ancestry in SW USA (ASW)                                                                                                                                                                   | 60            |
|                  | African-Caribbean       | African Caribbeans in Barbado (ACB)                                                                                                                                                                             | 96            |
|                  | Afro-Asiatic            | Al-Gharbiyah, NA, Monufia, Kafrel-Sheikh, Mansoura, Alexandria, Dakahlia, Samanoud, Al-Buhayrah, Minya, AlSharqia, El-Mahalla all from Egypt                                                                    | 99            |
|                  | Afro-Asiatic Cushitic   | Oromo, Somali from Ethiopia                                                                                                                                                                                     | 47            |
|                  | Afro-Asiatic Omotic     | Wolayta from Ethiopia                                                                                                                                                                                           | 24            |
|                  | KhoeSan                 | Khoe-San:Khoesan                                                                                                                                                                                                | 84            |
|                  | Niger Congo Bantu       | Baganda, Banyarwanda, Barundi, RwandeseU- gandan, Banyankole:Uganda Bakiga, Mutan- zania, Basoga, other uganda gwas unknown, Mutooro, Batooro, Nyanjiro (Tanzania) from Uganda and Luhya in Webuye, Kenya (LWK) | 2158          |
|                  | Niger-Congo Bantu South | Zulu                                                                                                                                                                                                            | 98            |
|                  | Niger-Congo Volta Niger | Esan in Nigeria (ESN), Yoruba in Ibadan, Nigeria (YRI)                                                                                                                                                          | 205           |
|                  | Niger-Congo West        | Gambian in Western Divisions in the Gambia (GWD), Mende in Sierra Leone (MSL)                                                                                                                                   | 198           |
| AMR              | Latin American          | Puerto Ricans from Puerto Rico (PUR), Colombians from Medellin, Colombia (CLM), Peruvians from Lima, Peru (PEL), Mexican Ancestry from Los Angeles USA (MXL)                                                    | 347           |
| EUR              | European Center         | British in England and Scotland (GBR)                                                                                                                                                                           | 91            |
|                  | European North          | Finnish in Finland (FIN)                                                                                                                                                                                        | 99            |
|                  | European South          | Iberian Population in Spain (IBS), Toscani in Italia (TSI)                                                                                                                                                      | 214           |
|                  | European USA            | Utah Residents with Northern and Western European Ancestry (CEU)                                                                                                                                                | 99            |
| EAS              | East Asian              | Southern Han Chinese (CHS), Chinese Dai in Xishuangbanna, China (CDX), Kinh in Ho Chi Minh City, Vietnam (KHV), Han Chinese in Beijing, China (CHB), Japanese in Tokyo, Japan (JPT)                             | 504           |
| SAS              | South Asian             | Punjabi from Lahore, Pakistan (PJL), Bengali from Bangladesh (BEB)                                                                                                                                              | 180           |
|                  | UK Indian               | Sri Lankan Tamil from the UK (STU), Indian Telugu from the UK (ITU)                                                                                                                                             | 204           |
|                  | USA Indian              | Gujarati Indian from Houston, Texas (GIH)                                                                                                                                                                       | 103           |
| Total            |                         |                                                                                                                                                                                                                 | 4,932         |
