# Supplementary material for: Genetic Modifiers of Sickle Cell Anemia Phenotype in a Cohort of Angolan Children
Source: Genes (Basel). 2024 Apr 8;15(4):469. doi: 10.3390/genes15040469 (PMC11049512; doi:10.3390/genes15040469)
Supplement: Supplementary file 1 [file genes-15-00469-s001.zip]

Archive with 5 entries (5 files):
- Supplementary Figures.pdf
- Supplementary Table S1.pdf
- Supplementary Table S2.pdf
- Supplementary Table S3.xls
- Supplementary Table S4.xls
