# Supplementary material for: Genetic Modifiers of Sickle Cell Anemia Phenotype in a Cohort of Angolan Children
Source: Genes (Basel). 2024 Apr 8;15(4):469. doi: 10.3390/genes15040469 (PMC11049512; doi:10.3390/genes15040469)
Supplement: Supplementary file 1 [file genes-15-00469-s001.zip › Supplementary Table S3.xls]

## Sheet: Sheet1
Supplementary Table 3:. Genetics distance (Fst) based on 237,572 common variants from the study targeted sequence data among the 20 ethnolinguistic cultural groups and HbF Angola.
KhoeSan	0	0.103	0.052	0.106	0.033	0.103	0.094	0.052	0.047	0.062	0.085	0.082	0.044	0.051	0.111	0.105	0.059	0.104	0.109	0.058	0.104
USAInd	0.103	0	0.085	0.024	0.076	0.004	0.024	0.083	0.069	0.041	0.099	0.021	0.071	0.063	0.042	0.025	0.047	0.026	0.029	0.05	0.005
NigerV	0.052	0.085	0	0.088	0.011	0.085	0.072	0.004	0.002	0.037	0.081	0.058	0.006	0.005	0.092	0.087	0.033	0.085	0.09	0.035	0.085
EURUSA	0.106	0.024	0.088	0	0.078	0.025	0.014	0.085	0.07	0.042	0.099	0.017	0.073	0.063	0.057	0	0.048	0.005	0.01	0.051	0.026
BantuS	0.033	0.076	0.011	0.078	0	0.075	0.066	0.013	0.01	0.036	0.076	0.054	0.008	0.013	0.081	0.077	0.032	0.076	0.08	0.033	0.075
SouthAs	0.103	0.004	0.085	0.025	0.075	0	0.024	0.082	0.068	0.041	0.099	0.021	0.07	0.062	0.036	0.025	0.046	0.026	0.028	0.05	0.003
LatinAm	0.094	0.024	0.072	0.014	0.066	0.024	0	0.069	0.056	0.033	0.097	0.016	0.059	0.048	0.034	0.012	0.037	0.015	0.022	0.042	0.023
BantuW	0.052	0.083	0.004	0.085	0.013	0.082	0.069	0	0.004	0.036	0.08	0.056	0.008	0.006	0.089	0.084	0.033	0.082	0.087	0.035	0.083
Caribb	0.047	0.069	0.002	0.07	0.01	0.068	0.056	0.004	0	0.027	0.08	0.044	0.005	0.002	0.075	0.069	0.024	0.067	0.072	0.026	0.069
Semitic	0.062	0.041	0.037	0.042	0.036	0.041	0.033	0.036	0.027	0	0.09	0.015	0.027	0.022	0.055	0.042	0.002	0.039	0.048	0.004	0.042
ANGOLA_HBF	0.085	0.099	0.081	0.099	0.076	0.099	0.097	0.08	0.08	0.09	0	0.094	0.078	0.084	0.1	0.099	0.088	0.099	0.1	0.088	0.099
Afro-As	0.082	0.021	0.058	0.017	0.054	0.021	0.016	0.056	0.044	0.015	0.094	0	0.046	0.037	0.043	0.017	0.021	0.013	0.025	0.025	0.025
Bantu	0.044	0.071	0.006	0.073	0.008	0.07	0.059	0.008	0.005	0.027	0.078	0.046	0	0.006	0.077	0.072	0.024	0.07	0.075	0.026	0.071
AA	0.051	0.063	0.005	0.063	0.013	0.062	0.048	0.006	0.002	0.022	0.084	0.037	0.006	0	0.071	0.062	0.019	0.06	0.067	0.022	0.063
EastAs	0.111	0.042	0.092	0.057	0.081	0.036	0.034	0.089	0.075	0.055	0.1	0.043	0.077	0.071	0	0.054	0.059	0.059	0.055	0.064	0.036
EURC	0.105	0.025	0.087	0	0.077	0.025	0.012	0.084	0.069	0.042	0.099	0.017	0.072	0.062	0.054	0	0.046	0.003	0.013	0.05	0.026
Cushitic	0.059	0.047	0.033	0.048	0.032	0.046	0.037	0.033	0.024	0.002	0.088	0.021	0.024	0.019	0.059	0.046	0	0.044	0.053	0.005	0.047
EURS	0.104	0.026	0.085	0.005	0.076	0.026	0.015	0.082	0.067	0.039	0.099	0.013	0.07	0.06	0.059	0.003	0.044	0	0.019	0.047	0.03
EURN	0.109	0.029	0.09	0.01	0.08	0.028	0.022	0.087	0.072	0.048	0.1	0.025	0.075	0.067	0.055	0.013	0.053	0.019	0	0.055	0.029
Omotic	0.058	0.05	0.035	0.051	0.033	0.05	0.042	0.035	0.026	0.004	0.088	0.025	0.026	0.022	0.064	0.05	0.005	0.047	0.055	0	0.05
UKInd	0.104	0.005	0.085	0.026	0.075	0.003	0.023	0.083	0.069	0.042	0.099	0.025	0.071	0.063	0.036	0.026	0.047	0.03	0.029	0.05	0
