# Supplementary material for: Genetic Modifiers of Sickle Cell Anemia Phenotype in a Cohort of Angolan Children
Source: Genes (Basel). 2024 Apr 8;15(4):469. doi: 10.3390/genes15040469 (PMC11049512; doi:10.3390/genes15040469)
Supplement: Supplementary file 1 [file genes-15-00469-s001.zip › Supplementary Table S4.xls]

## Sheet: Sheet1
Logistic association test of HbF SCA samples
CHR	SNP	BP	A1/A2	MAF	Gene	Band	Clinical	Beta	SE	P
2	rs1427407	60718043	T/G	0.2302	BCL11A	p16.1	NR	3.17	0.43	3.346e-12
2	rs1896296	60724087	G/T	0.2963	BCL11A	p16.1	NR	2.43	0.4	7.456e-09
2	rs11434093	60723096	C/CA	0.2937	BCL11A	p16.1	NR	2.4	0.4	1.208e-08
2	rs1896295	60724086	T/C	0.2937	BCL11A	p16.1	NR	2.4	0.4	1.208e-08
2	rs10172646	60720757	G/A	0.2989	BCL11A	p16.1	NR	2.4	0.4	1.368e-08
2	rs10195871	60720589	A/G	0.2989	BCL11A	p16.1	NR	2.4	0.4	1.368e-08
2	rs34211119	60720318	GT/G	0.2989	BCL11A	p16.1	NR	2.4	0.4	1.368e-08
2	rs4671393	60720951	A/G	0.2989	BCL11A	p16.1	NR	2.4	0.4	1.368e-08
2	rs7557939	60721347	G/A	0.2989	BCL11A	p16.1	NR	2.4	0.4	1.368e-08
2	rs7584113	60721311	A/G	0.2989	BCL11A	p16.1	NR	2.4	0.4	1.368e-08
2	rs766432	60719970	C/A	0.2989	BCL11A	p16.1	NR	2.4	0.4	1.368e-08
2	rs11886868	60720246	C/T	0.2963	BCL11A	p16.1	benign/likely-pathogenic	2.36	0.4	2.198e-08
2	rs1896294	60719074	C/T	0.2963	BCL11A	p16.1	NR	2.36	0.4	2.198e-08
2	rs7606173	60725451	C/G	0.4233	BCL11A	p16.1	NR	-1.95	0.37	5.388e-07
2	rs6706648	60722040	T/C	0.373	BCL11A	p16.1	NR	-2.05	0.4	5.801e-07
2	rs11692396	60710738	G/A	0.254	BCL11A	p16.1	NR	2.13	0.42	1.14e-06
11	rs112305015	5269802	A/C	0.002646	HBG1	p15.4	NR	18.25	3.74	2.32e-06
11	rs7131677	5284047	G/A	0.002646	NA	p15.4	NA	18.25	3.74	2.32e-06
6	rs551954328	135316558	T/C	0.002646	HBS1L	q23.3	NR	18.25	3.74	2.32e-06
2	rs60179237	60745472	C/G	0.00266	BCL11A	p16.1	NR	18.24	3.75	2.466e-06
6	rs551296931	135392932	T/A	0.002646	NA	q23.3	NR	18.05	3.75	3.04e-06
6	rs903161867	135414486	G/C	0.002646	NA	q23.3	NR	18.05	3.75	3.04e-06
6	rs539859934	135469527	G/A	0.002646	NA	q23.3	NR	18.05	3.75	3.04e-06
6	rs1013850640	135482498	A/G	0.002646	NA	q23.3	NR	18.05	3.75	3.04e-06
6	1900-01-30 06:47:00	135506159	A/G	0.002646	MYB	q23.3	benign	18.05	3.75	3.04e-06
6	rs889300302	135513022	G/A	0.002646	MYB	q23.3	NR	18.05	3.75	3.04e-06
6	rs963330408	135527566	C/T	0.002646	MYB, LOC105378011	q23.3	NR	18.05	3.75	3.04e-06
6	rs563906891	135530477	G/T	0.002646	MYB, LOC105378011	q23.3	NR	18.05	3.75	3.04e-06
6	rs113854947	135451792	G/T	0.002646	NA	q23.3	NR	18.05	3.75	3.04e-06
6	rs186305938	135461027	T/C	0.002646	NA	q23.3	NR	18.05	3.75	3.04e-06
6	rs190977950	135517853	G/A	0.002646	MYB, LOC105378011	q23.3	NR	18.05	3.75	3.04e-06
6	rs541327793	135471224	C/T	0.00266	NR	q23.3	NR	18.03	3.75	3.211e-06
11	rs1430700457	5317640	C/T	0.002778	NR	p15.4		18.16	3.78	3.226e-06
11	Não reportado	5226738	A/ATT	0.003425	NR	p15.4		18.06	3.79	4.473e-06
11	Não reportado	5238316	A/C	0.005747	NR	p15.4		18.37	3.78	5.235e-06
6	rs1353613475	135338724	C/T	0.003472	HBS1L	q23.3		17.78	3.91	1.152e-05
6	rs1774030298	135424686	C/T	0.002646	NA	q23.3	NR	16.74	3.78	1.62e-05
11	Não reportado	5244388	T/TG	0.003731	NA	p15.4		16.81	3.78	1.862e-05
2	rs45606437	60723108	A/AC	0.3651	BCL11A	p16.1	NR	-1.81	0.42	2.159e-05
6	rs151169997	135403315	T/C	0.01862	NA	q23.3	NR	6.28	1.46	2.761e-05
6	rs146293683	135494624	C/T	0.01323	NA	q23.3	NR	7.06	1.72	6.131e-05
11	Não reportado	5239390	C/CT	0.003623	NA	p15.4		16.56	4	6.199e-05
6	rs368905706	135323101	GTA/G	0.008772	HBS1L	q23.3		12.1	2.97	8.802e-05
2	rs72962586	60731766	T/C	0.1455	BCL11A	p16.1	NR	-2.13	0.53	8.962e-05
2	rs45484694	60711027	CT/C	0.266	BCL11A	p16.1	NR	1.8	0.45	0.0001078
6	rs139624826	135315432	T/G	0.01604	HBS1L	q23.3	NR	6.28	1.59	0.0001097
2	rs6732518	60708597	C/T	0.2963	BCL11A	p16.1	NR	1.71	0.43	0.0001133
6	1900-02-05 07:17:00	135383757	A/AAAAAAGAAAG	0.005882	HBS1L,MYB	q23.3		10.66	2.77	0.0001692
6	rs138256626	135345495	A/G	0.01344	HBS1L	q23.3	NR	6.64	1.74	0.0001837
2	rs72962596	60742245	T/C	0.1429	BCL11A	p16.1	NR	-2.03	0.54	0.0002165
2	rs6709302	60727629	A/G	0.3466	BCL11A	p16.1	NR	-1.53	0.41	0.0002391
6	rs140289539	135418665	A/C	0.02381	NA	q23.3	NR	4.86	1.31	0.0002635
6	rs10689764	135384420	CTTTT/CTTTTTTT	0.05385	NA	q23.3	NR	5.01	1.33	0.000362
2	rs12105383	60737160	C/A	0.3598	BCL11A	p16.1	NR	1.49	0.41	0.0003987
2	rs66488669	60734583	G/A	0.2201	BCL11A	p16.1	NR	-1.58	0.44	0.0004571
2	rs12621957	60682447	G/A	0.3836	BCL11A	p16.1	NR	-1.5	0.42	0.0004754
2	rs72962602	60743605	G/A	0.2222	BCL11A	p16.1	NR	-1.75	0.49	0.0005037
11	rs111530046	5295914	C/A	0.005291	NA	p15.4	NR	9.55	2.73	0.0005839
11	rs112599588	5269790	T/C	0.005291	HBG1	p15.4	NR	9.55	2.73	0.0005839
11	rs112680670	5295664	T/A	0.005291	NA	p15.4	NR	9.55	2.73	0.0005839
11	rs28440105	5269799	A/C	0.005291	HBG1	p15.4	NR	9.55	2.73	0.0005839
11	rs74747641	5296450	C/T	0.005291	NA	p15.4	NR	9.55	2.73	0.0005839
2	1900-01-09 19:22:00	60765874	CTGTGTG/CTGTGTGTGTGTG	0.04255	BCL11A	p16.1	pathogenic	5.76	1.62	0.000603
2	rs72964419	60755798	T/C	0.2196	BCL11A	p16.1	NR	-1.68	0.49	0.0006766
2	rs58789059	60736852	A/G	0.1931	BCL11A	p16.1	NR	-1.67	0.49	0.000698
6	rs73553571	135449946	T/C	0.01058	NA	q23.3	NR	6.69	1.94	0.0007052
6	rs182246492	135455701	T/C	0.01587	NA	q23.3	NR	5.47	1.59	0.000738
2	rs72962592	60737801	T/C	0.2196	BCL11A	p16.1	NR	-1.67	0.49	0.0007734
2	rs6740203	60740491	C/T	0.4788	BCL11A	p16.1	NR	1.43	0.42	0.0007751
2	rs146481566	60755943	G/GTAA	0.2275	BCL11A	p16.1	NR	-1.6	0.48	0.0009727
2	rs79059225	60755762	T/C	0.2275	BCL11A	p16.1	NR	-1.6	0.48	0.0009727
2	rs7593947	60704933	A/T	0.1931	BCL11A	p16.1	NR	1.69	0.51	0.001171
2	rs72964414	60750303	T/C	0.2143	BCL11A	p16.1	NR	-1.67	0.51	0.001175
2	rs12105711	60736985	T/G	0.254	BCL11A	p16.1	NR	1.45	0.45	0.001296
2	rs6738440	60722241	G/A	0.2884	BCL11A	p16.1	NR	-1.47	0.45	0.001306
2	rs356976	60748945	T/C	0.1931	BCL11A	p16.1	NR	1.68	0.51	0.001324
2	rs72962585	60729702	G/A	0.2328	BCL11A	p16.1	NR	-1.53	0.47	0.001352
2	rs6747156	60747663	C/A	0.4444	BCL11A	p16.1	NR	1.38	0.43	0.00148
6	rs548500212	135325086	C/CT	0.005464	HBS1L	q23.3	NR	8.92	2.76	0.001484
2	rs1469358	60742425	C/T	0.4894	BCL11A	p16.1	NR	1.34	0.42	0.00165
2	rs1510481	60743675	T/A	0.4894	BCL11A	p16.1	NR	1.34	0.42	0.00165
6	rs9494142	135431640	C/T	0.1164	LOC105378010 HBS1L,MYB	q23.3	NR	1.95	0.61	0.001671
2	rs7340264	60736529	A/G	0.2513	BCL11A	p16.1	NR	-1.46	0.46	0.001677
11	rs370975841	5256867	G/GA	0.01323	HBD	p15.4	NR	5.58	1.75	0.001681
2	rs7581162	60704484	T/A	0.4074	BCL11A	p16.1	NR	1.28	0.4	0.001739
6	rs138175199	135300069	G/A	0.02162	HBS1L	q23.3	NR	4.45	1.4	0.001739
2	rs10184550	60729294	G/A	0.1984	BCL11A	p16.1	NR	1.51	0.48	0.00193
2	rs356993	60750560	T/C	0.1949	BCL11A	p16.1	NR	1.67	0.53	0.00194
11	rs5010979	5279153	T/C	0.007937	NA	p15.4	NR	7.03	2.25	0.00206
11	rs5010980	5279327	C/G	0.007937	NA	p15.4	NR	7.03	2.25	0.00206
11	rs5010981	5279355	C/A	0.007937	NA	p15.4	NR	7.03	2.25	0.00206
6	rs142675952	135441648	A/G	0.02116	NA	q23.3	NR	4.35	1.4	0.002144
6	rs56341813	135442435	A/G	0.02116	NA	q23.3	NR	4.35	1.4	0.002144
11	rs112127651	5286846	G/C	0.008065	NA	p15.4	NR	7.02	2.26	0.002203
2	rs77434017	60749521	C/A	0.07407	BCL11A	p16.1	NR	2.14	0.69	0.002311
2	rs72964424	60756504	T/C	0.2169	BCL11A	p16.1	NR	-1.54	0.5	0.002352
2	rs72964428	60756755	G/C	0.2169	BCL11A	p16.1	NR	-1.54	0.5	0.002352
2	rs766431	60719918	G/A	0.07672	BCL11A	p16.1	NR	2.17	0.71	0.002563
6	rs968628980	135351321	A/G	0.005291	HBS1L	q23.3	NR	8.39	2.75	0.002619
16	rs12925761	176376	T/C	0.1693	NPRL3	p13.3	NR	1.64	0.55	0.003009
6	rs9494145	135432552	C/T	0.02128	NA	q23.3	NR	4.2	1.4	0.003014
2	rs17331129	60679942	C/T	0.1508	BCL11A	p16.1	NR	1.64	0.55	0.003248
2	rs168565	60744331	A/G	0.4868	BCL11A	p16.1	NR	1.26	0.42	0.003311
2	rs45595933	60755763	A/G	0.1376	BCL11A	p16.1	NR	1.64	0.55	0.003313
6	rs542799879	109001666	T/C	0.007937	FOXO3	q21	NR	6.69	2.25	0.003397
2	rs6545820	60742572	T/C	0.4894	BCL11A	p16.1	NR	-1.19	0.4	0.003507
6	rs142744772	135313389	T/C	0.02116	HBS1L	q23.3	NR	4.14	1.4	0.003517
6	rs148203858	135320029	T/C	0.02116	HBS1L	q23.3	NR	4.14	1.4	0.003517
2	rs58642035	60757130	C/A	0.2116	BCL11A	p16.1	NR	-1.5	0.51	0.003613
2	rs356979	60747743	T/C	0.4365	BCL11A	p16.1	NR	1.29	0.44	0.003643
2	rs356991	60744872	T/G	0.4365	BCL11A	p16.1	NR	1.29	0.44	0.003643
11	rs553403528	5248831	T/A	0.03988	NA	p15.4	NR	3.37	1.14	0.003661
16	rs2541609	178051	C/T	0.1746	NPRL3	p13.3	NR	1.6	0.54	0.003679
6	rs150675173	135479404	T/C	0.03175	NA	q23.3	NR	3.37	1.16	0.003973
6	rs530976621	135376642	T/TC	0.02394	HBS1L	q23.3		3.85	1.33	0.00419
6	1900-01-24 16:17:00	135301481	A/AAAG	0.02381	HBS1L	q23.3		3.83	1.32	0.004263
6	rs138460788	135311573	C/A	0.02381	HBS1L	q23.3	NR	3.83	1.32	0.004263
6	rs143340527	135313204	G/T	0.02381	HBS1L	q23.3	NR	3.83	1.32	0.004263
6	rs145591376	135366404	G/C	0.02381	HBS1L	q23.3	NR	3.83	1.32	0.004263
6	rs146778536	135388686	A/G	0.02381	NA	q23.3	NR	3.83	1.32	0.004263
6	rs192484231	135337244	C/G	0.02381	HBS1L	q23.3	NR	3.83	1.32	0.004263
6	rs55720831	135380742	G/C	0.02381	NA	q23.3	NR	3.83	1.32	0.004263
2	rs77406335	60696528	C/T	0.06614	BCL11A	p16.1	NR	-2.31	0.8	0.004286
6	rs61593090	135488083	A/G	0.09524	NA	q23.3	NR	1.95	0.67	0.004311
6	rs144508756	135343302	T/C	0.02116	HBS1L	q23.3	NR	4.05	1.4	0.004336
6	rs56185742	135382789	T/C	0.02406	NA	q23.3	NR	3.83	1.33	0.004413
11	rs968857	5260458	T/C	0.03968	NA	p15.4	NR	3	1.04	0.004499
6	rs9399136	135402339	C/T	0.007979	NA	q23.3	NR	6.5	2.26	0.004554
2	rs138451308	60774065	A/G	0.01058	BCL11A	p16.1	NR	5.62	1.96	0.004635
11	rs4320977	5258162	A/G	0.04142	NA	p15.4	NR	2.93	1.02	0.004719
11	rs10128556	5263683	T/C	0.005291	HBBP1	p15.4	NR	7.88	2.76	0.004744
11	rs11036641	5310578	G/A	0.005291	NA	p15.4	NR	7.88	2.76	0.004744
11	rs139559716	5314514	GGTTTCACT/G	0.005291	NA	p15.4	NR	7.88	2.76	0.004744
11	rs145323148	5284010	C/T	0.005291	NA	p15.4	NR	7.88	2.76	0.004744
11	rs2071348	5264146	G/T	0.005291	HBBP1	p15.4	NR	7.88	2.76	0.004744
11	rs2855121	5277291	T/C	0.005291	HBG2	p15.4	NR	7.88	2.76	0.004744
11	rs34501951	5280839	T/TA	0.005291	NA	p15.4	NR	7.88	2.76	0.004744
11	rs3759074	5257778	A/G	0.005291	NA	p15.4	NA	7.88	2.76	0.004744
11	rs72872549	5290053	T/C	0.005291	HBE1	p15.4	NR	7.88	2.76	0.004744
11	rs72872555	5310169	A/G	0.005291	NA	p15.4	NR	7.88	2.76	0.004744
11	rs7482144	5276169	A/G	0.005291	HBG2	p15.4	Uncertain-Significance	7.88	2.76	0.004744
6	rs150265192	135419322	G/C	0.005988	NA	q23.3	NR	7.88	2.79	0.005333
11	rs10768684	5248842	G/A	0.03106	HBB	p15.4	NR	3.65	1.3	0.005643
2	rs72964457	60777216	A/G	0.1561	BCL11A	p16.1	NR	-1.55	0.56	0.006134
6	rs55662963	135426597	A/G	0.08466	LOC105378010	q23.3	NR	1.94	0.7	0.006439
6	rs55997259	135426452	G/A	0.08466	LOC105378010	q23.3	NR	1.94	0.7	0.006439
11	rs112937703	5248840	A/ATG	0.02326	HBB	p15.4	NR	3.92	1.42	0.006571
6	rs7770417	135424774	A/G	0.1164	NA	q23.3	NR	1.69	0.62	0.006674
2	rs35507444	60681754	G/A	0.06349	BCL11A	p16.1	NR	2.08	0.76	0.006693
2	rs13420461	60714889	A/G	0.02381	BCL11A	p16.1	NR	-3.62	1.33	0.006954
6	rs981829683	135465257	A/G	0.005291	NA	q23.3	NR	7.53	2.76	0.007047
6	rs756840501	135495653	G/GTTAT	0.005291	NA	q23.3	NR	7.53	2.76	0.007047
11	rs4910740	5287290	G/A	0.03704	NA	p15.4	NA	2.94	1.08	0.007098
2	1900-01-29 11:04:00	60728640	CTTTT/CTTTTTT	0.2283	BCL11A	p16.1	pathogenic	3.05	1.08	0.007166
11	rs7119261	5249011	C/A	0.005319	HBB	p15.4	NR	7.5	2.76	0.007246
2	rs142703633	60723034	TA/T	0.0291	BCL11A	p16.1	NR	-3.28	1.21	0.007271
2	rs74644352	60720769	A/G	0.0291	BCL11A	p16.1	NR	-3.28	1.21	0.007271
2	rs77330833	60722971	A/C	0.0291	BCL11A	p16.1	NR	-3.28	1.21	0.007271
2	rs77374908	60723173	A/G	0.0291	BCL11A	p16.1	NR	-3.28	1.21	0.007271
11	rs11036238	5225635	C/G	0.005291	NA	p15.4	NR	7.48	2.76	0.007447
11	rs3813727	5255912	A/G	0.03704	HBD	p15.4	NR	2.92	1.08	0.007572
6	rs11757217	108882570	T/C	0.2407	FOXO3	q21	NR	1.25	0.46	0.007614
11	Não reportado	5248822	GAAAA/GA	0.02134		p15.4		4.06	1.51	0.007991
2	rs4672393	60697654	A/C	0.3413	BCL11A	p16.1	NR	-1.21	0.45	0.008054
11	rs57966301	5271582	T/A	0.01323	HBG1	p15.4	NR	4.71	1.76	0.008161
2	rs13019832	60710571	A/G	0.3862	BCL11A	p16.1	NR	-1.09	0.41	0.008252
6	rs9376090	135411228	C/T	0.005291	NA	q23.3	NR	7.38	2.77	0.008307
2	rs28366455	60745396	C/T	0.4603	BCL11A	p16.1	NR	1.1	0.41	0.008376
6	rs60323739	135427419	A/G	0.1005	LOC105378010	q23.3	NR	1.76	0.66	0.008548
6	rs12664956	135384188	C/T	0.1508	NA	q23.3	NR	-1.64	0.62	0.008642
2	rs113671572	60680796	T/C	0.06085	BCL11A	p16.1	NR	2.3	0.87	0.008728
6	rs62429819	135490468	T/A	0.0663	NA	q23.3	NR	2.15	0.81	0.008788
6	rs3752383	135522755	G/A	0.09259	MYB, LOC105378011	q23.3	NR	1.86	0.7	0.009111
2	rs6740172	60740323	G/A	0.2381	BCL11A	p16.1	NR	1.22	0.46	0.00924
2	rs6545818	60738986	A/G	0.2778	BCL11A	p16.1	NR	1.13	0.43	0.009967
6	rs13214669	135299959	C/T	0.1402	HBS1L	q23.3	NR	-1.56	0.6	0.01028
16	rs8047658	175727	T/C	0.1693	NPRL3	p13.3	NR	1.41	0.55	0.01104
11	rs10837774	5323388	A/G	0.007937	OR51B4	p15.4	NR	5.81	2.27	0.0112
11	rs12270279	5322101	T/C	0.007937	OR51B4	p15.4	NR	5.81	2.27	0.0112
11	rs12283334	5322520	A/G	0.007937	OR51B4	p15.4	NR	5.81	2.27	0.0112
11	rs72886289	5323534	T/C	0.007937	OR51B4	p15.4	NR	5.81	2.27	0.0112
2	rs77648855	60715449	A/G	0.01587	BCL11A	p16.1	NR	-4.13	1.62	0.01138
2	rs78194722	60720103	G/C	0.01587	BCL11A	p16.1	NR	-4.13	1.62	0.01138
11	Não reportado	5292974	*/A	0.1893	HBE1,OR51B4	p15.4		1.06	0.42	0.01189
11	rs968856	5260576	T/C	0.04396	NA	p15.4	NR	2.59	1.02	0.01216
6	rs201339576	135493573	A/C	0.01235	NA	q23.3	NR	5.04	1.99	0.0124
6	rs55683605	135487107	T/C	0.05556	NA	q23.3	NR	2.16	0.86	0.01278
2	rs6545819	60739061	T/A	0.2725	BCL11A	p16.1	NR	1.13	0.45	0.01292
6	rs376676503	135494556	CAGATAGAT/CAGAT	0.1127	NA	q23.3	NR	-1.99	0.79	0.01292
6	rs9321486	135447820	T/C	0.2513	NA	q23.3	NR	1.23	0.49	0.01318
2	rs753530938	60767028	T/C	0.007937	BCL11A	p16.1		5.67	2.27	0.01328
6	rs2026938	135444009	A/G	0.3624	NA	q23.3	NR	-1.04	0.42	0.01346
6	rs142921117	135461016	A/G	0.01852	NA	q23.3	NR	3.73	1.5	0.01388
6	rs145367038	135467917	G/C	0.01852	NA	q23.3	NR	3.73	1.5	0.01388
6	rs146052332	135466086	G/A	0.01852	NA	q23.3	NR	3.73	1.5	0.01388
6	rs150205157	135452752	C/T	0.01852	NA	q23.3	NR	3.73	1.5	0.01388
2	1900-02-09 21:05:00	60745081	CACATGATGATGTCACACATAT/C	0.04696	BCL11A	p16.1	pathogenic	2.46	0.99	0.01418
2	rs6724431	60736837	C/T	0.3201	BCL11A	p16.1	NR	0.96	0.39	0.01441
2	rs7340410	60738667	T/G	0.2725	BCL11A	p16.1	NR	1.1	0.45	0.01441
19	rs149022596	12995677	T/A	0.007937	KLF1	p13.2	T - benign	5.61	2.27	0.01444
2	rs998300809	60768207	T/C	0.01852	BCL11A	p16.1		-3.7	1.5	0.01464
11	rs10637609	5256849	AAG/A	0.01323	HBD	p15.4	NR	4.34	1.77	0.01492
11	rs9665964	5256843	C/G	0.01323	HBD	p15.4	NR	4.34	1.77	0.01492
2	rs137895462	60681179	A/AAG	0.4048	BCL11A	p16.1	NR	1.77	0.72	0.01511
6	1900-01-20 17:24:00	135295788	CAA/CA	0.2946	HBS1L	q23.3		-1.28	0.52	0.01513
11	rs10488679	5260936	G/A	0.01587	NA	p15.4	NR	3.96	1.62	0.01539
6	rs6940878	135366309	A/G	0.0873	HBS1L	q23.3	NR	-1.82	0.75	0.01604
2	rs12477097	60698397	C/A	0.3175	BCL11A	p16.1	NR	-1.15	0.48	0.01617
6	rs56329496	135530039	A/C	0.08201	MYB, LOC105378011	q23.3	NR	1.79	0.74	0.01636
11	rs7130110	5296104	C/G	0.02116	NA	p15.4	NA	3.41	1.41	0.01667
6	rs199879427	135417578	C/CATT	0.07181	NA	q23.3	NR	1.8	0.75	0.01744
2	rs147237222	60771011	G/A	0.01323	BCL11A	p16.1	NR	-4.24	1.77	0.01748
2	rs114566772	60772979	C/G	0.06349	BCL11A	p16.1	NR	2.04	0.85	0.0176
2	1900-01-15 19:26:00	60774518	C/CT	0.2306	BCL11A	p16.1	pathogenic	1.41	0.59	0.01773
6	rs7757054	135487614	G/A	0.08466	NA	q23.3	NR	1.74	0.73	0.01803
2	rs144395176	60709900	T/C	0.01323	BCL11A	p16.1	NR	-4.22	1.77	0.01804
2	rs1487783056	60718810	A/AAAAAAAG	0.01351	BCL11A	p16.1		-4.24	1.78	0.01817
6	rs60578126	135436334	G/A	0.07527	NA	q23.3	NR	1.84	0.77	0.01832
6	rs1165968750	135527204	G/C	0.04696	MYB, LOC105378011	q23.3		-2.23	0.94	0.01888
2	rs77924806	60765876	*/G	0.1262	NA	p16.1	NA	1.89	0.79	0.01906
2	rs75468792	60728156	G/C	0.08466	BCL11A	p16.1	NR	1.64	0.69	0.01912
16	rs62032626	176157	T/C	0.164	NPRL3	p13.3	NR	1.31	0.55	0.01916
11	rs113622787	5276282	G/A	0.03175	HBG2	p15.4	NR	2.73	1.17	0.02013
6	rs185003621	135494066	A/C	0.03175	NA	q23.3	NR	2.71	1.17	0.02097
6	rs73550894	135400230	C/T	0.06878	NA	q23.3	NR	1.77	0.76	0.02114
16	rs8051955	175726	A/G	0.1349	NPRL3	p13.3	NR	1.45	0.62	0.02146
11	rs3759067	5292192	C/T	0.01323	HBE1	p15.4	NR	4.1	1.77	0.02178
2	rs1678644705	60718824	GA/GAA	0.3594	BCL11A	p16.1		2.29	0.98	0.02208
11	rs11827654	5272521	A/G	0.03352	HBG1	p15.4	NR	2.71	1.18	0.02244
11	rs6578588	5252251	T/C	0.01058	NA	p15.4	NR	4.55	1.98	0.02248
2	rs4672394	60698461	T/C	0.3095	BCL11A	p16.1	NR	-1.12	0.49	0.02258
11	rs12295158	5252794	A/G	0.03968	NA	p15.4	NR	2.4	1.05	0.02364
2	rs72960699	60684034	C/T	0.05291	BCL11A	p16.1	NR	-2	0.88	0.02384
6	rs34343700	135345687	GTT/GTTT	0.395	HBS1L	q23.3		-1.19	0.52	0.02412
19	rs1011949978	12996049	C/T	0.005291	KLF1			6.32	2.78	0.0242
6	rs553614217	135386362	C/T	0.002646	NR	q23.3	NR	8.9	3.92	0.0244
6	rs886890503	135458896	T/C	0.002646	NR	q23.3	NR	8.9	3.92	0.0244
6	rs9399140	135448643	C/T	0.3942	NA	q23.3	NR	-0.92	0.41	0.02543
6	rs2223385	135435171	A/G	0.4259	NA	q23.3	NR	-0.9	0.4	0.02578
11	rs73404550	5323594	G/T	0.02116	OR51B4	p15.4	NR	3.17	1.41	0.02598
6	rs34125490	135289905	*/AC	0.03977	HBS1L	q23.3	NA	-2.33	1.04	0.02607
11	rs4283007	5258490	A/T	0.01323	NA	p15.4	NR	3.98	1.77	0.02613
6	rs73774555	135368034	A/C	0.1295	HBS1L	q23.3	NR	1.44	0.65	0.02733
11	rs12222763	5253477	G/C	0.03439	NA	p15.4	NA	2.5	1.13	0.02747
11	rs5789380	5253462	TATAAAAA/T	0.03439	NA	p15.4	NR	2.5	1.13	0.02747
11	rs201200424	5243357	C/CT	0.3691	NA	p15.4	NR	-0.97	0.44	0.02763
2	rs77662111	60737401	T/C	0.1296	BCL11A	p16.1	NR	1.3	0.59	0.02801
11	Não reportado	5259538	TCA/T	0.002825		p15.4		8.81	3.98	0.02821
6	rs78602190	135451819	G/A	0.1799	NA	q23.3	NR	1.18	0.54	0.0284
6	1900-01-20 03:52:00	135294976	GA/GAA	0.4108	HBS1L	q23.3	benign	-1.82	0.83	0.02867
11	rs10837643	5258038	T/A	0.0625	NA	p15.4	NA	1.65	0.75	0.02882
6	rs139114703/rs34642393	135349635	C/CAT	0.1349	HBS1L	q23.3	NR	-1.41	0.64	0.02906
6	rs1022506	135511587	A/G	0.07937	MYB	q23.3	NR	1.65	0.75	0.02914
6	rs12660713	135517996	A/G	0.07937	MYB, LOC105378011	q23.3	NR	1.65	0.75	0.02914
6	rs112749262	135510915	C/CTTTA	0.02116	MYB	q23.3	NR	3.11	1.41	0.02925
6	rs141140896	135509328	C/G	0.02116	MYB	q23.3	NR	3.11	1.41	0.02925
6	rs144157729	135477906	C/T	0.02116	NA	q23.3	NR	3.11	1.41	0.02925
6	1900-01-13 21:40:00	135285964	*/A	0.1158	HBS1L	q23.3	benign	1.38	0.63	0.02946
6		135397456	A/T	0.002857	NA HBS1L,MYB	q23.3	NR	8.82	4.02	0.02946
6	Não reportado	135348368	C/A	0.003226	HBS1L	q23.3	benign	8.82	4.04	0.03046
2	1900-01-20 01:35:00	60780647	GGAAAAAAAAAAAAAAAAAAA/G	0.003145	BCL11A	p16.1	pathogenic	8.82	4.05	0.03089
2	1900-01-09 19:02:00	60765854	GTC/GTCTCTC	0.05189	BCL11A	p16.1	pathogenic	-2.2	1.01	0.03131
11	rs7935971	5292823	G/A	0.03704	HBE1	p15.4	NR	2.35	1.09	0.03176
2	rs1123573	60707588	G/A	0.4074	BCL11A	p16.1	NR	-0.91	0.42	0.03252
6	rs41294868	135523786	A/G	0.07672	MYB, LOC105378011	q23.3	NR	1.64	0.76	0.03254
11	rs11329694	5267384	A/AC	0.02116	BGLT3	p15.4	NR	3.04	1.42	0.03287
11	rs6578594	5293625	A/T	0.02116	NA	p15.4	NA	3.04	1.42	0.03287
11	rs7479652	5293113	T/C	0.02116	HBE1	p15.4	NR	3.04	1.42	0.03287
6	1900-01-17 23:48:00	135488460	A/AAAAAAG	0.1013	HBS1L,MYB	q23.3		1.68	0.78	0.03306
16	rs149164538	172009	T/G	0.005291	NPRL3	p13.3	NR	5.96	2.78	0.03349
6	rs41294858	135412636	C/T	0.127	NA	q23.3	NR	-1.26	0.59	0.03399
6	rs34825830	135383218	T/TAAA	0.1561	NA	q23.3	NR	-1.28	0.6	0.03412
6	rs10457631	135445179	C/A	0.2937	NA	q23.3	NR	-0.96	0.45	0.03421
11	rs41468147	5268752	C/T	0.02381	BGLT3	p15.4	NR	2.85	1.34	0.03429
11	rs7104281	5267222	A/G	0.02381	BGLT3	p15.4	NR	2.85	1.34	0.03429
2	rs139422069	60751150	C/CA	0.08466	BCL11A	p16.1	NR	1.46	0.69	0.03453
2	rs74958177	60717776	G/A	0.03439	BCL11A	p16.1	NR	-2.39	1.13	0.03488
6	1900-01-06 08:42:00	135406178	GTTTTG/TTTTTG	0.02941	HBS1L,MYB	q23.3		2.03	0.95	0.03505
11	rs4426158	5258429	T/C	0.02116	NA	p15.4	NR	2.44	1.15	0.03506
6	rs4896122	135295081	C/T	0.2516	HBS1L	q23.3	NR	-1.11	0.52	0.03519
2	rs114615813	60736492	T/C	0.08466	BCL11A	p16.1	NR	1.46	0.69	0.03531
2	rs115397838	60737314	T/C	0.08466	BCL11A	p16.1	NR	1.46	0.69	0.03531
11	rs2855037	5272397	C/A	0.02646	HBG1	p15.4	NR	2.69	1.27	0.03574
11	rs59495893	5274126	A/C	0.02646	HBG2	p15.4	NR	2.69	1.27	0.03574
11	rs112479156	5276320	C/T	0.0291	HBG2	p15.4	NR	2.57	1.22	0.03588
11	rs112760631	5274967	C/T	0.0291	HBG2	p15.4	NR	2.57	1.22	0.03588
11	rs113047906	5274708	T/C	0.0291	HBG2	p15.4	NR	2.57	1.22	0.03588
11	rs113425530	5274720	A/C	0.0291	HBG2	p15.4	NR	2.57	1.22	0.03588
11	rs1143541	5269330	A/T	0.0291	HBG1	p15.4	NR	2.57	1.22	0.03588
11	rs11820733	5281264	A/G	0.0291	NA	p15.4	NR	2.57	1.22	0.03588
11	rs11826265	5273525	C/A	0.0291	NA	p15.4	NR	2.57	1.22	0.03588
11	rs11826304	5282474	T/C	0.0291	NA	p15.4	NR	2.57	1.22	0.03588
11	rs11827946	5281269	G/A	0.0291	NA	p15.4	NR	2.57	1.22	0.03588
11	rs183504559	5274949	G/C	0.0291	HBG2	p15.4	NR	2.57	1.22	0.03588
11	rs7102446	5284254	T/C	0.0291	NA	p15.4	NR	2.57	1.22	0.03588
11	rs73402629	5271739	A/C	0.0291	HBG1	p15.4	NR	2.57	1.22	0.03588
11	rs2402330	5269465	T/A	0.02116	HBG1	p15.4	NR	2.99	1.42	0.03603
6	1900-01-22 05:46:00	135494578	GATAGATAGATAGATAGATAC/G	0.04286	HBS1L,MYB	q23.3		2.12	1	0.03608
11	rs16911998	5257700	A/G	0.01852	HBD	p15.4	NR	3.18	1.51	0.03629
11	rs16912175	5262232	T/C	0.01852	NA	p15.4	NR	3.18	1.51	0.03629
11	rs7105491	5267339	T/C	0.01852	BGLT3	p15.4	NR	3.18	1.51	0.03629
11	rs7131145	5266797	A/G	0.01852	HBBP1/BGLT3	p15.4	NR	3.18	1.51	0.03629
11	rs74910558	5264922	G/C	0.01852	HBBP1	p15.4	NR	3.18	1.51	0.03629
11	rs77786719	5250185	T/G	0.01852	HBB	p15.4	NR	3.18	1.51	0.03629
11	rs80138317	5255900	T/C	0.01852	HBD	p15.4	NR	3.18	1.51	0.03629
11	rs7118981	5258238	A/G	0.01862	NA	p15.4	NR	3.19	1.51	0.03644
11	rs77044643	5255075	C/A	0.01892	HBD	p15.4	NR	3.18	1.51	0.03647
6	1900-01-23 08:01:00	135496153	A/AAAAAG	0.02557	HBS1L,MYB	q23.3		2.86	1.36	0.03649
6	rs4594969	135285586	T/A	0.2261	HBS1L	q23.3	NR	-1.08	0.51	0.03655
19	rs557875179	4046922	A/G	0.02486	ZBTB7A	p13.3		2.85	1.35	0.03688
6	rs2237261	135534646	GTAATACT/ATAATACT	0.07754	MYB, LOC105378011	q23.3	benign	1.6	0.76	0.03703
6	rs190536695	135330921	A/G	0.01812	HBS1L	q23.3	NR	3.93	1.87	0.03744
6	rs12663810	135289782	C/G	0.1461	HBS1L	q23.3	NR	-1.32	0.63	0.03757
6	rs9389271	135433404	T/C	0.4176	NA	q23.3	NR	-0.85	0.41	0.03777
2	rs150918139	60770653	G/C	0.0582	BCL11A	p16.1	NR	1.86	0.89	0.038
2	rs1669342798	60756416	C/G	0.002646	BCL11A	p16.1		8.19	3.93	0.0384
6	1900-01-23 17:40:00	135431196	C/A	0.002646	HBS1L,MYB	q23.3		8.19	3.93	0.0384
11	rs10488677	5261470	T/G	0.02116	NA	p15.4	NR	2.95	1.42	0.03856
11	rs10488678	5261374	A/G	0.02116	NA	p15.4	NR	2.95	1.42	0.03856
11	rs10488681	5259768	G/A	0.02116	NA	p15.4	NR	2.95	1.42	0.03856
11	rs16911934	5251478	C/T	0.02116	NA	p15.4	NR	2.95	1.42	0.03856
11	rs73400685	5251134	G/A	0.02116	NA	p15.4	NR	2.95	1.42	0.03856
11	rs73402604	5259959	G/A	0.02116	NA	p15.4	NR	2.95	1.42	0.03856
2	rs115134715	60780044	T/C	0.05026	BCL11A	p16.1	NR	-1.87	0.9	0.03858
11	rs16911905	5249290	G/C	0.02139	HBB	p15.4	NR	2.95	1.42	0.03872
6	rs9376094	135445814	A/T	0.4206	NA	q23.3	NR	-0.85	0.41	0.0393
11	rs10488680	5260067	T/C	0.01587	NA	p15.4	NR	3.37	1.63	0.03937
11	rs73402606	5260110	C/A	0.01587	NA	p15.4	NR	3.37	1.63	0.03937
11	rs73402607	5260122	C/A	0.01587	NA	p15.4	NR	3.37	1.63	0.03937
11	rs10608857	5267138	A/ATAC	0.01892	BGLT3	p15.4	NR	3.15	1.52	0.03952
6	rs1320959	135437386	T/C	0.1915	NA	q23.3	NR	1.05	0.5	0.03968
2	rs10631738	60704735	TGAAAG/T	0.358	BCL11A	p16.1	NR	-0.97	0.47	0.03971
2	rs112371535	60715937	C/CG	0.03175	BCL11A	p16.1	NR	-2.42	1.17	0.03971
11	rs12788935	5226469	G/T	0.002717	NA	p15.4	NR	8.15	3.94	0.04
11	rs12788941	5226471	A/T	0.002717	NA	p15.4	NR	8.15	3.94	0.04
2	rs112727722	60729173	A/G	0.1534	BCL11A	p16.1	NR	1.15	0.55	0.04003
6	rs7738267	135537193	G/A	0.3254	MYB, LOC105378011	q23.3	NR	0.87	0.42	0.04004
2	rs1573044840	60745078	TCCCAATG/T	0.04945	BCL11A	p16.1		2.04	0.98	0.04014
6	rs59792276	135364024	C/T	0.1383	HBS1L	q23.3	NR	1.23	0.59	0.04018
11	rs527253363	5275826	T/G	0.02247	HBG2	p15.4		2.94	1.43	0.04048
11	rs542613377	5275827	T/G	0.02247	HBG2	p15.4		2.94	1.43	0.04048
11	rs112215533	5276380	C/G	0.02381	HBG2	p15.4	NR	2.76	1.34	0.0407
11	rs139821845	5283903	C/G	0.02381	NA	p15.4	NR	2.76	1.34	0.0407
11	rs73402631	5273060	C/G	0.02381	HBG1	p15.4	NR	2.76	1.34	0.0407
11	rs73402654	5281315	G/T	0.02381	NA	p15.4	NR	2.76	1.34	0.0407
11	rs73402665	5285993	T/C	0.02381	NA	p15.4	NR	2.76	1.34	0.0407
11	rs73402668	5287551	C/T	0.02381	NA	p15.4	NA	2.76	1.34	0.0407
11	rs111838663	5256504	G/T	0.002646	HBD	p15.4	NR	8.09	3.93	0.04087
11	rs112336602	5290597	C/T	0.002646	HBE1	p15.4	NR	8.09	3.93	0.04087
11	rs138720077	5289228	AGTTTT/A	0.002646	HBE1	p15.4	NR	8.09	3.93	0.04087
11	rs2855039	5271671	T/C	0.002646	HBG1	p15.4	NR	8.09	3.93	0.04087
2	rs566479070	60724655	C/T	0.002646	BCL11A	p16.1		8.09	3.93	0.04087
6	rs925496445	135300197	C/G	0.002646	HBS1L	q23.3		8.09	3.93	0.04087
6	Não reportado	135396802	G/GT	0.002646	NA	q23.3	NR	8.09	3.93	0.04087
6	rs10484494	135430093	A/G	0.002646	LOC105378010 HBS1L,MYB	q23.3	NR	8.09	3.93	0.04087
6	rs139656602	135364212	G/GA	0.002646	HBS1L	q23.3	NR	8.09	3.93	0.04087
6	rs41294864	135438623	G/A	0.002646	NA	q23.3	NR	8.09	3.93	0.04087
6	rs72972197	135352337	C/T	0.005291	HBS1L	q23.3	NR	4.05	1.97	0.04087
6	rs72974176	135441748	T/C	0.002646	NA	q23.3	NR	8.09	3.93	0.04087
2	rs57186683	60732690	G/A	0.1481	BCL11A	p16.1	NR	1.17	0.57	0.04105
2	rs74543787	60734784	G/C	0.1481	BCL11A	p16.1	NR	1.17	0.57	0.04105
2	rs973490752	60718767	C/T	0.007937	BCL11A	p16.1		4.69	2.28	0.04115
11	rs61080176	5269992	A/ACACACACACGCGCGCGCG	0.00266	HBG1	p15.4	NR	8.07	3.93	0.04138
11	rs75257741	5299150	T/A	0.01323	NA	p15.4	NR	3.65	1.78	0.04154
2	rs137866865	60751033	C/A	0.09259	BCL11A	p16.1	NR	1.33	0.65	0.04222
6	1900-02-05 23:58:00	135515830	G/GT	0.002688	MYB	q23.3		8.04	3.94	0.0426
11	rs891763661	5292070	CTT/CT	0.08108	HBE1	p15.4	NR	-1.6	0.79	0.04273
2	rs115917401	60748487	A/G	0.06085	BCL11A	p16.1	NR	-1.7	0.83	0.0428
2	rs116579637	60746211	A/C	0.06085	BCL11A	p16.1	NR	-1.7	0.83	0.0428
2	1899-12-31 14:13:00	60687069	TTC/TTCTC	0.06417	BCL11A	p16.1		1.78	0.87	0.04283
6	rs115059005	135473694	C/G	0.25	NR	q23.3	NR	1.83	0.39	0.04301
2	rs148893646	60723153	A/C	0.01058	BCL11A	p16.1	NR	-4.04	1.98	0.04305
6	rs9321495	135528605	G/C	0.02381	MYB, LOC105378011	q23.3	NR	2.72	1.34	0.04335
6	rs34039880	135391117	ATTTT/ATTTTT	0.2419	nr	q23.3	NR	2.03	0.98	0.04343
11	rs151148651	5227269	C/CT	0.002941	NA	p15.4	NR	8.13	4	0.04366
6	rs210944	135535018	G/A	0.005291	MYB, LOC105378011	q23.3	NR	5.66	2.79	0.04372
2	rs7577014	60779840	A/G	0.3757	BCL11A	p16.1	NR	0.8	0.39	0.04395
6	1900-01-17 23:44:00	135488456	A/AAAAAAAAAAG	0.005682	HBS1L,MYB	q23.3		5.74	2.83	0.04429
11	rs3061878	5249688	C/CAAAAT	0.02151	HBB	p15.4	NR	2.86	1.41	0.04454
2	rs62142646	60726427	T/C	0.119	BCL11A	p16.1	NR	-1.25	0.62	0.04466
19	rs750861348	4046340	G/GT	0.1635	ZBTB7A	p13.3		1.39	0.69	0.04467
16	rs7190975	172299	A/C	0.1037	NPRL3	p13.3	NR	-1.34	0.66	0.04477
6	nova	135303898	C/T	0.003125	HBS1L	q23.3		8.13	4.03	0.04555
6	rs143741069	135356746	A/G	0.03191	HBS1L	q23.3	NR	2.35	1.17	0.04578
2	rs17028290	60683373	G/A	0.2857	BCL11A	p16.1	NR	-0.9	0.45	0.04665
6	1900-02-06 10:09:00	135450905	GTT/GT	0.2987	HBS1L,MYB	q23.3		1.2	0.6	0.04681
11	rs4910543	5258827	G/C	0.01892	NA	p15.4	NR	2.67	1.33	0.04685
6	1900-01-17 23:50:00	135488462	AAAG/AAAAGAAG	0.1993	HBS1L,MYB	q23.3		1.26	0.63	0.04693
11	rs59080002	5311350	G/GTCTA	0.03968	NA	p15.4	NR	2.11	1.06	0.04696
11	rs11036485	5279040	A/T	0.04233	NA	p15.4	NR	1.92	0.96	0.04698
16	rs139776004	171451	T/C	0.1032	NPRL3	p13.3	NR	-1.32	0.66	0.04731
16	rs141403187	177181	C/T	0.1032	NPRL3	p13.3	NR	-1.32	0.66	0.04731
16	rs146101157	172152	G/A	0.1032	NPRL3	p13.3	NR	-1.32	0.66	0.04731
16	rs7195934	172359	C/G	0.1032	NPRL3	p13.3	NR	-1.32	0.66	0.04731
6	rs977579317	135304520	C/T	0.005291	HBS1L	q23.3		5.56	2.79	0.04766
6	rs953708994	135403677	T/G	0.005291	NA	q23.3	NR	5.56	2.79	0.04766
6	rs887162025	135430022	T/C	0.005291	LOC105378010 HBS1L,MYB	q23.3	NR	5.56	2.79	0.04766
6	rs920313758	135479291	A/C	0.005291	NA	q23.3	NR	5.56	2.79	0.04766
11	rs11384309	5252559	CTT/CT	0.0221		p15.4		2.85	1.43	0.04806
2	rs116440337	60770895	T/C	0.07672	BCL11A	p16.1	NR	1.57	0.79	0.04818
6	rs67162601	135399427	TAAAA/TAAAAAA	0.4623	NA	q23.3	NR	2.01	1	0.04845
6	rs112476323	135336812	T/C	0.1386	HBS1L	q23.3	NR	1.23	0.62	0.04859
19	rs10407416	12997733	G/C	0.0291	KLF1	p13.2	NA	2.42	1.22	0.04873
2	1900-02-07 17:52:00	60742008	GAAAA/GAAA	0.3992	BCL11A	p16.1	pathogenic	-1.38	0.69	0.04886
11	rs4910735	5258852	G/A	0.01955	NA	p15.4	NR	2.66	1.34	0.04888
6	rs189704496	135345345	A/G	0.04118	HBS1L	q23.3	NR	1.94	0.98	0.04906
11	rs1847765414	5259162	C/T	0.002646		p15.4		7.79	3.93	0.04909
11	rs202117063	5290284	A/AT	0.002646	HBE1	p15.4		7.79	3.93	0.04909
2	rs1030495001	60723145	A/C	0.002646	BCL11A	p16.1		7.79	3.93	0.04909
2	rs945389435	60725978	C/T	0.002646	BCL11A	p16.1		7.79	3.93	0.04909
6	NOVA	135341495	G/T	0.002646	HBS1L	q23.3		7.79	3.93	0.04909
6	rs975230460	135456147	GA/G	0.002646	NR,	q23.3	NR	7.79	3.93	0.04909
6	rs1411919	135432061	G/A	0.3995	NA	q23.3	NR	-0.8	0.41	0.04967
Logistic association test of VOC SCA samples
CHRA417:K433A417:K439A417:K445A41A417:K487	SNP	BP	A1/A2	MAF	Gene	Band	Clinical	OR	SE	P
16	rs2562163	176841	G/A	0.2037	NPRL3	p13.3	NR	0.34	-0.1	0.0004648
6	rs139095739	135429233	C/T	0.2832	LOC105378010	q23.3	NR	2.7	0.82	0.0009377
6	rs28373149	135439051	C/A	0.2884	NA	q23.3	NR	2.59	0.79	0.001123
6	1900-01-17 23:48:00	135488460	A/AAAAAAG	0.1013	HBS1L,MYB	q23.3		0.27	-0.08	0.001446
6	rs74596334	135432005	T/C	0.2831	LOC105378010 HBS1L,MYB	q23.3	NR	2.47	0.79	0.001768
6	rs77210461	135429466	A/G	0.1481	LOC105378010	q23.3	NR	4.16	1.34	0.001973
6	rs1074849	135423412	A/G	0.1534	NA	q23.3	NR	0.4	-0.13	0.002137
6	rs9373124	135423209	C/T	0.4947	NA	q23.3	NR	1.97	0.66	0.002684
6	rs77319487	135410982	G/A	0.04762	NA	q23.3	NR	0.21	-0.07	0.002718
6	rs35959442	135424179	G/C	0.3942	NA	q23.3	NR	2.1	0.7	0.002912
6	rs111524707	135438971	T/C	0.04762	NA	q23.3	NR	0.22	-0.07	0.003023
6	1900-01-09 18:57:00	135345577	CAAAAAAAAAAA/CAAAAAAAAA	0.1264	HBS1L	q23.3	benign	0.35	-0.12	0.003106
6	rs12205603	135500087	C/G	0.2619	NA	q23.3	NR	0.49	-0.17	0.003959
6	rs7758845	135428537	C/A	0.3995	LOC105378010	q23.3	NR	2.02	0.7	0.004032
6	rs11759553	135422296	T/A	0.3889	NA	q23.3	NR	2.01	0.71	0.004507
6	rs9494139	135414793	G/A	0.05026	NA	q23.3	NR	0.25	-0.09	0.004808
6	rs6920211	135431318	C/T	0.3968	LOC105378010 HBS1L,MYB	q23.3	NR	1.98	0.71	0.004998
16	rs17146023	174169	G/A	0.3016	NPRL3	p13.3	NR	0.5	-0.18	0.005401
16	rs13336077	172025	T/C	0.1614	NPRL3	p13.3	NR	0.41	-0.15	0.005834
6	rs9385715	135454385	T/C	0.1436	NA	q23.3	NR	0.43	-0.16	0.005851
6	rs9321490	135494875	C/T	0.2672	NA	q23.3	NR	0.5	-0.18	0.005964
6	rs5880245	135452438	T/TA	0.3972	NA	q23.3	NR	0.35	-0.13	0.006023
6	rs1775119704	135312172	G/GA	0.2934	HBS1L	q23.3		2.69	0.98	0.006066
6	rs555690421	135534821	T/A	0.03175	MYB, LOC105378011	q23.3		0.18	-0.06	0.006223
6	rs111659434	135428759	A/G	0.03175	LOC105378010	q23.3	NR	0.18	-0.06	0.006223
6	rs112510126	135425015	T/G	0.03175	NA	q23.3	NR	0.18	-0.06	0.006223
6	rs9385719	135524516	A/G	0.4037	MYB, LOC105378011	q23.3	NR	1.99	0.73	0.006442
6	rs114071504	135527037	A/G	0.09788	MYB, LOC105378011	q23.3	NR	5.4	2	0.006785
6	rs1569534	135451580	T/C	0.172	NA	q23.3	NR	0.47	-0.17	0.007011
6	rs4895440	135426558	T/A	0.3995	LOC105378010	q23.3	NR	1.93	0.72	0.007112
2	rs45484694	60711027	CT/C	0.266	BCL11A	p16.1	NR	2.27	0.85	0.007292
6	1900-02-12 19:43:00	135460119	*/T	0.138	HBS1L,MYB	q23.3		0.41	-0.15	0.00737
6	rs2078213	135458071	C/T	0.1587	NA	q23.3	NR	0.45	-0.17	0.007552
6	rs2223385	135435171	A/G	0.4259	NA	q23.3	NR	0.54	-0.2	0.007615
6	rs9389270	135431807	T/C	0.1111	LOC105378010 HBS1L,MYB	q23.3	NR	0.41	-0.16	0.007655
6	rs3071559	135348914	ATTT/AT	0.3125	HBS1L	q23.3		3.22	1.21	0.007812
16	rs13331107	174410	G/A	0.164	NPRL3	p13.3	NR	0.43	-0.16	0.007822
16	rs17146027	174743	C/T	0.164	NPRL3	p13.3	NR	0.43	-0.16	0.007822
6	rs9389271	135433404	T/C	0.4176	NA	q23.3	NR	0.54	-0.2	0.008094
6	rs9376095	135450755	C/T	0.1667	NA	q23.3	NR	0.46	-0.18	0.008311
6	rs9385720	135527363	TAATAATAAT/AAATAATAAT	0.4188	MYB, LOC105378011	q23.3		0.52	-0.2	0.008442
6	rs17064262	135465474	C/T	0.2169	NA	q23.3	NR	2.39	0.91	0.008605
6	1900-01-20 03:52:00	135294976	GA/GAA	0.4108	HBS1L	q23.3		3.13	1.19	0.008782
6	rs9389272	135459837	A/G	0.1508	NA	q23.3	NR	2.94	1.12	0.008836
16	rs13336074	172016	T/C	0.1878	NPRL3	p13.3	NR	0.46	-0.18	0.00902
6	rs79571224	135495432	G/A	0.1032	NA	q23.3	NR	4.15	1.61	0.009853
2	1900-01-16 11:13:00	60775465	CTTT/CTTTT	0.2778	BCL11A	p16.1	pathogenic	0.18	-0.07	0.01002
6	rs79004481	135480092	T/C	0.09259	NA	q23.3	NR	4.98	1.93	0.01009
6	rs55670970	135450891	GTT/GT	0.1622	NA	q23.3	NR	0.47	-0.18	0.01064
6	Não reportado	135397441	*/T	0.06461	NA	q23.3	NR	0.36	-0.14	0.01138
6	rs10080326	135400119	G/A	0.07407	NA	q23.3	NR	0.36	-0.14	0.0121
6	rs9494138	135407586	A/G	0.07407	NA	q23.3	NR	0.36	-0.14	0.0121
6	rs76899322	135469506	A/G	0.08995	NA	q23.3	NR	4.77	1.91	0.01231
6	rs61738647	135282735	C/T	0.1667	HBS1L	q23.3	NR	2.59	1.04	0.01265
6	rs11960991	135476551	A/G	0.2037	NA	q23.3	NR	2.29	0.92	0.01313
6	rs9385716	135455329	G/A	0.209	NA	q23.3	NR	0.53	-0.21	0.01317
2	1900-01-13 02:42:00	60705098	*/T	0.104	BCL11A	p16.1	pathogenic	0.38	-0.15	0.0137
6	rs182432365	135389474	A/G	0.03175	NA	q23.3	NR	0.22	-0.09	0.01389
6	rs200898299	135363962	A/AACAAAAAAAAAAAAC	0.2939	HBS1L	q23.3	NR	2.22	0.9	0.01409
6	rs112921369	135344574	G/T	0.02957	HBS1L	q23.3	NR	0.2	-0.08	0.01437
6	rs7775140	135491487	G/A	0.4418	NA	q23.3	NR	1.82	0.74	0.01442
2	rs75883866	60743626	A/G	0.0291	BCL11A	p16.1	NR	0.2	-0.08	0.01468
6	rs575677378	135294786	C/T	0.0291	HBS1L	q23.3		0.2	-0.08	0.01468
6	rs113090468	135451796	C/A	0.0291	NA	q23.3	NR	0.2	-0.08	0.01468
6	rs113245566	135393954	C/T	0.0291	NA	q23.3	NR	0.2	-0.08	0.01468
6	rs139391134	135517937	G/C	0.0291	MYB, LOC105378011	q23.3	NR	0.2	-0.08	0.01468
6	rs143206382	135517994	G/A	0.0291	MYB, LOC105378011	q23.3	NR	0.2	-0.08	0.01468
6	rs147692392	135527556	T/C	0.0291	MYB, LOC105378011	q23.3	NR	0.2	-0.08	0.01468
6	rs147982245	135530422	G/A	0.0291	MYB, LOC105378011	q23.3	NR	0.2	-0.08	0.01468
6	rs35697718	135323961	G/C	0.0291	HBS1L	q23.3	Benign (G)	0.2	-0.08	0.01468
6	rs76029016	135352135	C/T	0.0291	HBS1L	q23.3	NR	0.2	-0.08	0.01468
6	1900-02-12 19:44:00	135460120	*/T	0.1189	HBS1L,MYB	q23.3		0.42	-0.17	0.01469
6	rs1411919	135432061	G/A	0.3995	NA	q23.3	NR	0.57	-0.23	0.01469
6	rs28449450	135439275	C/T	0.0873	NA	q23.3	NR	4.57	1.88	0.01501
6	rs55732099	135434782	T/C	0.0873	NA	q23.3	NR	4.57	1.88	0.01501
16	rs2541610	177002	A/T	0.1296	NPRL3	p13.3	NR	0.45	-0.19	0.01692
6	rs1041479	135488496	T/C	0.4615	NA	q23.3	NR	1.74	0.73	0.01726
6	rs6924687	135467521	A/T	0.2063	NA	q23.3	NR	2.2	0.93	0.01782
11	rs6578596	5295631	G/A	0.01587	NA	p15.4	NA	0.07	-0.03	0.01826
6	rs894559981	135469567	G/GA	0.01587	NR	q23.3	NR	0.07	-0.03	0.01826
2	rs1427407	60718043	T/G	0.2302	BCL11A	p16.1	NR	2.07	0.88	0.0186
6	rs7762830	135523774	A/G	0.3492	MYB, LOC105378011	q23.3	NR	1.86	0.79	0.01893
6	rs10872428	135491872	T/G	0.1561	NA	q23.3	NR	0.52	-0.22	0.01934
6	rs1135205	135281795	C/T	0.4188	HBS1L	q23.3	NR	0.64	-0.28	0.0194
6	rs9494167	135489069	T/C	0.4388	NA	q23.3	NR	1.75	0.75	0.0194
6	rs9494137	135403971	C/T	0.05793	NA	q23.3	NR	0.33	-0.14	0.0196
6	rs12191243	135446826	G/C	0.127	NA	q23.3	NR	0.49	-0.21	0.02046
6	rs9494141	135430299	C/T	0.1685	LOC105378010 HBS1L,MYB	q23.3	NR	2.18	0.95	0.02163
6	rs7745289	135380327	G/A	0.1799	NA	q23.3	NR	2.28	0.99	0.02171
6	rs4896120	135293512	C/G	0.1534	HBS1L	q23.3	NR	0.51	-0.22	0.02306
6	rs7773126	135318390	A/G	0.1534	HBS1L	q23.3	NR	0.51	-0.22	0.02306
2	rs7593947	60704933	A/T	0.1931	BCL11A	p16.1	NR	2.16	0.95	0.02348
6	rs11758774	135383789	G/T	0.1667	NA	q23.3	NR	2.31	1.03	0.02483
6	rs56316290	135485498	A/G	0.206	NA	q23.3	NR	2.07	0.92	0.02483
6	1900-01-28 21:33:00	135504165	*/TTCG	0.01437	MYB	q23.3	benign	0.08	-0.04	0.02577
2	rs1223695317	60685168	C/CT	0.0604	BCL11A	p16.1		0.33	-0.15	0.02597
6	rs7775698	135418635	T/C	0.1611	NA	q23.3	NR	0.5	-0.22	0.02656
6	rs1774313644	135453060	CAAAA/CAAAAAAAAAAAAAAAAAAAA	0.0493	NR	q23.3	NR	0.36	-0.16	0.02703
6	1900-02-04 23:46:00	135383306	A/AT	0.05556	HBS1L,MYB	q23.3		0.34	-0.16	0.02721
6	rs61738492	135282771	A/G	0.2328	HBS1L	q23.3	NR	1.97	0.89	0.0276
6	1900-02-12 19:41:00	135460117	CTTTT/CTTTTTT	0.1129	HBS1L,MYB	q23.3		0.35	-0.16	0.02791
6	rs2026310	135465551	C/A	0.4894	NA	q23.3	NR	0.58	-0.27	0.02894
6	rs2327586	135495226	C/T	0.3307	NA	q23.3	NR	1.81	0.83	0.02899
6	rs11759062	135381248	C/A	0.1852	NA	q23.3	NR	2.13	0.99	0.03093
6	rs6900070	135443604	T/C	0.2751	NA	q23.3	NR	1.81	0.84	0.03201
6	1900-01-22 13:23:00	135363963	*/ACAAAAAAAAAAAAC	0.1978	HBS1L	q23.3	benign	2.37	1.11	0.03255
11	rs111978456	5311492	G/GC	0.06614	NA	p15.4	NR	0.41	-0.19	0.03289
16	rs35555273	173714	G/C	0.06085	NPRL3	p13.3	NR	0.38	-0.18	0.03352
2	rs113995950	60706229	C/T	0.03704	BCL11A	p16.1	NR	0.31	-0.15	0.03359
6	rs4896131	135392100	C/A	0.3107	NA	q23.3	NR	0.62	-0.29	0.0339
6	rs111870406	135444149	A/G	0.2831	NA	q23.3	NR	1.79	0.84	0.03435
6	rs55981133	135443843	C/G	0.2831	NA	q23.3	NR	1.79	0.84	0.03435
6	rs56267938	135446469	G/A	0.2831	NA	q23.3	NR	1.79	0.84	0.03435
6	rs138509287	135420386	A/C	0.02646	NA	q23.3	NR	0.24	-0.12	0.03464
6	rs6569997	135461134	T/C	0.4683	NA	q23.3	NR	0.58	-0.28	0.03578
6	rs7740945	135461866	A/C	0.4683	NA	q23.3	NR	0.58	-0.28	0.03578
6	rs35367489	135344455	A/G	0.1649	HBS1L	q23.3	NR	2.15	1.02	0.03581
11	rs72872557	5314359	C/T	0.01323	NA	p15.4	NR	0.09	-0.04	0.03584
2	rs144395176	60709900	T/C	0.01323	BCL11A	p16.1	NR	0.09	-0.04	0.03584
6	rs116460276	135407493	G/A	0.01323	NA	q23.3	NR	0.09	-0.04	0.03584
6	rs148826327	135399356	A/G	0.01323	NA	q23.3	NR	0.09	-0.04	0.03584
6	rs149496650	135348223	A/G	0.01323	HBS1L	q23.3	NR	0.09	-0.04	0.03584
2	rs11692396	60710738	G/A	0.254	BCL11A	p16.1	NR	1.8	0.86	0.03636
6	rs7768809	135450899	G/T	0.1561	NA	q23.3	NR	2.17	1.04	0.0367
6	rs2050019	135463947	T/C	0.4841	NA	q23.3	NR	0.6	-0.29	0.03704
6	rs33930218	109004889	CAAA/CAAAA	0.4449	FOXO3	q21		2.82	1.36	0.03794
6	rs4896127	135345459	A/T	0.1196	HBS1L	q23.3	NR	2.56	1.23	0.038
6	rs210938	135537897	G/A	0.3598	MYB, LOC105378011	q23.3	NR	0.63	-0.3	0.03892
2	rs113671572	60680796	T/C	0.06085	BCL11A	p16.1	NR	4.79	2.32	0.03896
6	rs9376097	135479677	C/T	0.1534	NA	q23.3	NR	2.16	1.05	0.03994
6	1900-01-28 21:34:00	135504166	*/TCG	0.01748	MYB	q23.3	benign	0.1	-0.05	0.04094
6	rs210939	135537890	G/C	0.3148	MYB, LOC105378011	q23.3	NR	0.63	-0.31	0.04204
6	rs6909822	135463333	A/G	0.4603	NA	q23.3	NR	0.6	-0.29	0.04214
6	rs743589	135522939	T/C	0.3651	MYB, LOC105378011	q23.3	NR	1.68	0.83	0.04281
6	rs35554774	135449350	G/GAA	0.35	NA	q23.3	NR	0.5	-0.25	0.04309
6	rs9402691	135487502	C/G	0.2354	NA	q23.3	NR	0.59	-0.29	0.04327
6	rs9376096	135469752	T/C	0.4841	NA	q23.3	NR	0.62	-0.31	0.04374
6	rs1883355	135461937	G/A	0.4709	NA	q23.3	NR	0.6	-0.3	0.04383
6	rs36006349	135346639	C/CAA	0.246	HBS1L	q23.3	NR	0.58	-0.29	0.04421
11	rs7130110	5296104	C/G	0.02116	NA	p15.4	NA	0.22	-0.11	0.04501
6	rs55954464	135443931	C/T	0.2566	NA	q23.3	NR	1.78	0.89	0.04546
6	rs11759077	135381351	G/A	0.1799	NA	q23.3	NR	2.01	1.01	0.04594
11	Não reportado	5285375	CA/CAA	0.4371	NA	p15.4		0.22	-0.11	0.04659
11	rs145843585	5321510	CAGG/C	0.06878	NA	p15.4	NR	0.44	-0.22	0.04669
6	rs55875437	135467188	T/C	0.4101	NA	q23.3	NR	1.65	0.83	0.04717
6	rs1380882573	135320591	C/T	0.02469	HBS1L	q23.3		0.23	-0.11	0.04741
6	rs7751525	135463708	G/A	0.4127	NA	q23.3	NR	1.61	0.82	0.04896
16	rs79737174	172646	C/A	0.06878	NPRL3	p13.3	NR	3.49	1.78	0.04957
6	rs67876204	135330938	ATT/ATTT	0.3611	HBS1L	q23.3		1.91	0.98	0.04999
Logistic association test of the hemolytic SCA samples
CHR	SNP	BP	A1/A2	MAF	Gene	Band	Clinical	OR	SE	P
6	rs138509287	135420386	A/C	0.02646	NA	q23.3	NR	10.19	3.01	0.0006972
6	1900-02-04 23:46:00	135383306	A/AT	0.05556	HBS1L,MYB	q23.3		5.62	1.78	0.001574
6	rs55875437	135467188	T/C	0.4101	NA	q23.3	NR	0.27	-0.09	0.002258
6	rs150439252	135429366	T/G	0.02381	LOC105378010	q23.3	NR	8.39	2.83	0.003014
6	rs9494154	135468005	T/A	0.4048	NA	q23.3	NR	0.28	-0.09	0.003055
6	rs7751525	135463708	G/A	0.4127	NA	q23.3	NR	0.29	-0.1	0.003132
6	rs9402681	135397301	G/T	0.1711	NA	q23.3	NR	3.4	1.16	0.003394
6	rs530702207	135511925	AT/A	0.02646	MYB	q23.3		6.93	2.4	0.003929
6	rs148494937	135452082	A/G	0.02646	NA	q23.3	NR	6.93	2.4	0.003929
6	rs149751423	135482370	C/T	0.02646	NA	q23.3	NR	6.93	2.4	0.003929
6	rs151167914	135493193	C/T	0.02646	NA	q23.3	NR	6.93	2.4	0.003929
6	rs76362969	135454629	A/G	0.02646	NA	q23.3	NR	6.93	2.4	0.003929
6	rs1775119704	135312172	G/GA	0.2934	HBS1L	q23.3		0.18	-0.06	0.004429
6	rs78243357	135368016	T/A	0.01562	HBS1L	q23.3	NR	15.11	5.31	0.004464
6	rs558524942	135286841	A/G	0.01323	HBS1L	q23.3		13.83	4.98	0.005486
6	rs530528266	135378632	T/C	0.01323	NA	q23.3		13.83	4.98	0.005486
6	rs139611567	135482343	C/T	0.01323	NA	q23.3	NR	13.83	4.98	0.005486
6	rs200327611	135323959	A/G	0.01323	HBS1L	q23.3	NR	13.83	4.98	0.005486
6	rs73555746	135521489	C/A	0.01323	MYB, LOC105378011	q23.3	NR	13.83	4.98	0.005486
2	1900-01-04 13:02:00	60758294	T/G	0.01337	BCL11A	p16.1	pathogenic	13.67	4.95	0.005708
6	rs56735271	135489006	C/T	0.03968	NA	q23.3	NR	4.94	1.88	0.008554
11	rs6578596	5295631	G/A	0.01587	NA	p15.4	NA	9.17	3.53	0.009426
6	rs114298899	135524449	T/C	0.01587	MYB, LOC105378011	q23.3	NR	9.17	3.53	0.009426
6	rs10872428	135491872	T/G	0.1561	NA	q23.3	NR	2.49	0.96	0.009518
6	rs5880245	135452438	T/TA	0.3972	NA	q23.3	NR	3.82	1.49	0.01016
6	Não reportado	135372385	GA/G	0.01622	HBS1L	q23.3		8.94	3.48	0.01025
6	rs148916456	135345195	C/T	0.01648	HBS1L	q23.3	NR	8.78	3.45	0.01093
6	rs111524707	135438971	T/C	0.04762	NA	q23.3	NR	3.55	1.41	0.01201
6	rs116338436	135336055	G/C	0.02116	HBS1L	q23.3	NR	6.13	2.45	0.01253
2	rs75883866	60743626	A/G	0.0291	BCL11A	p16.1	NR	5.41	2.17	0.01258
6	rs116218808	135432067	T/C	0.0291	NA	q23.3	NR	5.41	2.17	0.01258
6	rs145265805	135447753	A/C	0.0291	NA	q23.3	NR	5.41	2.17	0.01258
6	rs150316070	135448876	A/C	0.0291	NA	q23.3	NR	5.41	2.17	0.01258
6	rs9389263	135400565	G/A	0.08466	NA	q23.3	NR	3.26	1.31	0.01265
6	rs73555724	135491527	C/G	0.04233	NA	q23.3	NR	4.46	1.79	0.01268
6	rs74370255	135344201	A/G	0.02139	HBS1L	q23.3	NR	6.06	2.44	0.01296
6	rs210939	135537890	G/C	0.3148	MYB, LOC105378011	q23.3	NR	2.17	0.88	0.01351
11	Não reportado como INS	5267659	G/GA	0.03107	BGLT3	p15.4		5.36	2.17	0.01354
6	rs115871601	135458906	T/C	0.05291	NA	q23.3	NR	3.66	1.48	0.01367
6	rs949895	135405359	C/T	0.1005	NA	q23.3	NR	2.94	1.2	0.01414
6	rs553802141	135459643	CA/CAA	0.4769	NR	q23.3	NR	0.2	-0.08	0.01424
2	rs911584246	60696454	A/AG	0.01852	BCL11A	p16.1		6.83	2.86	0.01671
6	rs111851432	135323837	C/G	0.01852	HBS1L	q23.3	NR	6.83	2.86	0.01671
6	rs73555742	135518108	C/T	0.04497	MYB, LOC105378011	q23.3	NR	4.06	1.72	0.01818
6	rs1074849	135423412	A/G	0.1534	NA	q23.3	NR	2.4	1.02	0.01887
6	rs1883354	135457541	A/G	0.1772	NA	q23.3	NR	2.47	1.06	0.0195
6	rs116496659	135449212	A/G	0.03175	NA	q23.3	NR	4.71	2.02	0.01956
6	rs9402691	135487502	C/G	0.2354	NA	q23.3	NR	2.28	0.99	0.02133
6	1900-01-10 00:03:00	135345883	T/TTAAGA	0.02454	HBS1L	q23.3		6.04	2.63	0.02146
16	rs183984340	175649	T/C	0.007937	NPRL3	p13.3	NR	17.58	7.66	0.02166
6	rs75844714	135425131	A/C	0.03243	NA	q23.3	NR	4.59	2	0.02167
6	rs147760667	135468228	A/T	0.05172	NA	q23.3	NR	3.39	1.48	0.02182
6	rs2078213	135458071	C/T	0.1587	NA	q23.3	NR	2.42	1.05	0.02204
6	rs866095767	109005024	TT/AT	0.008021	FOXO3	q21		17.37	7.6	0.02222
6	rs6924521	135467415	T/C	0.09259	NA	q23.3	NR	2.89	1.28	0.02372
6	rs6929368	135467725	T/A	0.09259	NA	q23.3	NR	2.89	1.28	0.02372
11	rs12286811	5270004	G/A	0.3069	HBG1	p15.4	NR	3.69	1.64	0.024
6	rs879558413	135535469	GA/GAA	0.2321	MYB, LOC105378011	q23.3		0.28	-0.12	0.02455
6	1900-01-17 23:48:00	135488460	A/AAAAAAG	0.1013	HBS1L,MYB	q23.3		3.19	1.42	0.02462
6	1900-01-03 22:34:00	135468226	AATAT/AAT	0.08333	HBS1L,MYB	q23.3		3.65	1.65	0.02689
6	rs34723585	135529219	ATTTT/ATTT	0.3509	MYB, LOC105378011	q23.3		10.87	4.91	0.02692
6	rs210938	135537897	G/A	0.3598	MYB, LOC105378011	q23.3	NR	2.04	0.92	0.02747
6	rs77014212	135389753	T/C	0.209	NA	q23.3	NR	2.45	1.12	0.02809
11	rs7130110	5296104	C/G	0.02116	NA	p15.4	NA	5.43	2.48	0.02822
6	rs372290144	135445027	AACAACAGCAAAAAACTGTGTGATATGCTCCCAGCCCTTAAAGGG/A	0.02116	NR	q23.3	NR	5.43	2.48	0.02822
6	rs1331308	135405122	A/C	0.09524	NA	q23.3	NR	2.79	1.27	0.02878
6	rs9483783	135401040	C/T	0.1138	NA	q23.3	NR	2.71	1.24	0.02911
11	rs11036571	5295644	G/T	0.04497	NA	p15.4	NA	3.34	1.54	0.02954
11	rs11036574	5295774	T/C	0.04497	NA	p15.4	NA	3.34	1.54	0.02954
2	rs372477611	60748241	CCA/CACA	0.1607	BCL11A	p16.1		3.01	1.39	0.02971
6	rs55654242	135477987	A/T	0.3915	NA	q23.3	NR	0.43	-0.2	0.0309
6	rs743589	135522939	T/C	0.3651	MYB, LOC105378011	q23.3	NR	0.42	-0.19	0.03116
11	rs867959808	5297582	C/A	0.01639		p15.4	NR	5.59	2.61	0.03226
6	rs7765438	135477337	A/G	0.1349	NA	q23.3	NR	2.61	1.22	0.03298
6	rs62429812	135480147	G/T	0.1799	NA	q23.3	NR	0.21	-0.1	0.0336
6	rs6920829	135519500	C/T	0.2249	MYB, LOC105378011	q23.3	NR	0.31	-0.14	0.03365
6	rs78870638	135437755	GT/GTT	0.4724	NA	q23.3	NR	0.19	-0.09	0.03373
6	rs12205603	135500087	C/G	0.2619	NA	q23.3	NR	2.04	0.96	0.034
6	rs7758845	135428537	C/A	0.3995	LOC105378010	q23.3	NR	0.46	-0.22	0.03425
6	rs12191243	135446826	G/C	0.127	NA	q23.3	NR	2.27	1.07	0.03474
11	rs11036683	5325005	C/A	0.01058	OR51B4	p15.4	NR	8.74	4.15	0.03515
2	rs539224186	60780219	T/C	0.01058	BCL11A	p16.1		8.74	4.15	0.03515
6	rs7775544	135293889	A/T	0.01058	HBS1L	q23.3	NR	8.74	4.15	0.03515
2	rs1427407	60718043	T/G	0.2302	BCL11A	p16.1	NR	0.32	-0.15	0.0355
6	rs9376095	135450755	C/T	0.1667	NA	q23.3	NR	2.2	1.05	0.03582
11	rs4390373	5249732	G/A	0.0125	HBB	p15.4	NR	8.75	4.17	0.03597
2	rs146481566	60755943	G/GTAA	0.2275	BCL11A	p16.1	NR	2.14	1.02	0.03605
2	rs79059225	60755762	T/C	0.2275	BCL11A	p16.1	NR	2.14	1.02	0.03605
6	1900-01-06 08:41:00	135406177	GTTTTTG/TTTTTTG	0.0452	HBS1L,MYB	q23.3		2.24	1.07	0.03624
2	rs140011420	60764430	G/A	0.01075	BCL11A	p16.1	NR	8.58	4.11	0.03672
6	rs6920211	135431318	C/T	0.3968	LOC105378010 HBS1L,MYB	q23.3	NR	0.46	-0.22	0.03775
6	rs9389270	135431807	T/C	0.1111	LOC105378010 HBS1L,MYB	q23.3	NR	2.32	1.12	0.03789
6	rs35959442	135424179	G/C	0.3942	NA	q23.3	NR	0.46	-0.23	0.03945
11	rs7928386	5297583	A/C	0.01913	NA	p15.4	NR	4.61	2.24	0.03962
6	rs56247805, rs113909655	135524520	T/TTGG	0.4548	MYB, LOC105378011	q23.3	NR	0.47	-0.23	0.03979
6	rs9321490	135494875	C/T	0.2672	NA	q23.3	NR	2	0.97	0.04064
6	rs62429811	135480054	C/T	0.164	NA	q23.3	NR	0.22	-0.11	0.04203
6	rs570916195	135395481	CT/CTT	0.274	NA	q23.3	NR	2.96	1.46	0.04304
6	rs9373124	135423209	C/T	0.4947	NA	q23.3	NR	0.52	-0.26	0.0434
6	rs17064262	135465474	C/T	0.2169	NA	q23.3	NR	0.33	-0.16	0.04466
6	rs574555580	135282926	CACCCATAGACCCCAGTGGTGTGCAGT/C	0.02381	HBS1L	q23.3		4.5	2.24	0.04477
6	rs115040208	135463904	A/G	0.02381	NA	q23.3	NR	4.5	2.24	0.04477
6	rs139331616	135461414	A/G	0.02381	NA	q23.3	NR	4.5	2.24	0.04477
6	rs140526737	135388718	T/G	0.02381	NA	q23.3	NR	4.5	2.24	0.04477
6	rs78022260	135352562	G/A	0.02381	HBS1L	q23.3	NR	4.5	2.24	0.04477
6	rs1986846	135481885	A/T	0.2143	NA	q23.3	NR	0.33	-0.16	0.04535
6	rs6922903	135507394	C/T	0.2937	MYB	q23.3	NR	0.41	-0.21	0.04727
6	rs12203816	135529561	T/C	0.393	MYB, LOC105378011	q23.3	NR	1.85	0.93	0.04755
6	rs2050020	135464053	A/G	0.1005	NA	q23.3	NR	2.42	1.22	0.0481
11	rs112075505	5276402	TTTAAAG/T	0.05026	HBG2	p15.4	NR	2.93	1.48	0.04838
2	rs72964457	60777216	A/G	0.1561	BCL11A	p16.1	NR	2.2	1.12	0.04845
11	rs374092925	5225903	*/T	0.1771	NA	p15.4	NR	2.02	1.02	0.04886
6	rs9385716	135455329	G/A	0.209	NA	q23.3	NR	1.97	1	0.0492
6	rs1569534	135451580	T/C	0.172	NA	q23.3	NR	2.06	1.05	0.04929
11	rs112035597	5277116	G/A	0.05053	HBG2	p15.4	NR	2.91	1.48	0.04956
11	rs113981422	5277117	C/A	0.05053	HBG2	p15.4	NR	2.91	1.48	0.04956

## Sheet: Folha2
hgnc

## Sheet: Folha1
	Logistic association test of HbF SCA samples
	CHR	SNP	BP	A1/A2	MAF	Gene	Band	Clinical	Beta	SE	P
1	2	rs1427407	60718043	T/G	0.2302	NA	NA	NA	3.17	0.43	3.346e-12
2	2	rs1896296	60724087	G/T	0.2963	NA	NA	NA	2.43	0.4	7.456e-09
3	2	rs11434093	60723096	C/CA	0.2937	NA	NA	NA	2.4	0.4	1.208e-08
4	2	rs1896295	60724086	T/C	0.2937	NA	NA	NA	2.4	0.4	1.208e-08
5	2	rs10172646	60720757	G/A	0.2989	NA	NA	NA	2.4	0.4	1.368e-08
6	2	rs10195871	60720589	A/G	0.2989	NA	NA	NA	2.4	0.4	1.368e-08
7	2	rs34211119	60720318	GT/G	0.2989	NA	NA	NA	2.4	0.4	1.368e-08
8	2	rs4671393	60720951	A/G	0.2989	NA	NA	NA	2.4	0.4	1.368e-08
9	2	rs7557939	60721347	G/A	0.2989	NA	NA	NA	2.4	0.4	1.368e-08
10	2	rs7584113	60721311	A/G	0.2989	NA	NA	NA	2.4	0.4	1.368e-08
11	2	rs766432	60719970	C/A	0.2989	NA	NA	NA	2.4	0.4	1.368e-08
12	2	rs11886868	60720246	C/T	0.2963	NA	NA	NA	2.36	0.4	2.198e-08
13	2	rs1896294	60719074	C/T	0.2963	NA	NA	NA	2.36	0.4	2.198e-08
14	2	rs7606173	60725451	C/G	0.4233	NA	NA	NA	-1.95	0.37	5.388e-07
15	2	rs6706648	60722040	T/C	0.373	NA	NA	NA	-2.05	0.4	5.801e-07
16	2	rs11692396	60710738	G/A	0.254	NA	NA	NA	2.13	0.42	1.14e-06
17	11	rs112305015	5269802	A/C	0.002646	NA	NA	NA	18.25	3.74	2.32e-06
18	11	rs7131677	5284047	G/A	0.002646	NA	NA	NA	18.25	3.74	2.32e-06
19	6	1900-02-04 03:34:00	135316558	T/C	0.002646	HBS1L	q23.3	benign	18.25	3.74	2.32e-06
20	2	rs60179237	60745472	C/G	0.00266	NA	NA	NA	18.24	3.75	2.466e-06
21	6	1900-02-11 16:12:00	135392932	T/A	0.002646	HBS1L,MYB			18.05	3.75	3.04e-06
22	6	1900-01-12 03:10:00	135414486	G/C	0.002646	HBS1L,MYB			18.05	3.75	3.04e-06
23	6	1900-01-04 20:15:00	135469527	G/A	0.002646	HBS1L,MYB			18.05	3.75	3.04e-06
24	6	1900-01-13 20:26:00	135482498	A/G	0.002646	HBS1L,MYB			18.05	3.75	3.04e-06
25	6	1900-01-30 06:47:00	135506159	A/G	0.002646	MYB	q23.3	benign	18.05	3.75	3.04e-06
26	6	1900-02-04 01:10:00	135513022	G/A	0.002646	MYB	q23.3	benign	18.05	3.75	3.04e-06
27	6	1900-02-14 03:34:00	135527566	C/T	0.002646	MYB	q23.3	benign	18.05	3.75	3.04e-06
28	6	1900-01-01 15:49:00	135530477	G/T	0.002646	MYB	q23.3	benign	18.05	3.75	3.04e-06
29	6	rs113854947	135451792	G/T	0.002646	NA	NA	NA	18.05	3.75	3.04e-06
30	6	rs186305938	135461027	T/C	0.002646	NA	NA	NA	18.05	3.75	3.04e-06
31	6	rs190977950	135517853	G/A	0.002646	NA	NA	NA	18.05	3.75	3.04e-06
32	6	1900-01-06 00:32:00	135471224	C/T	0.00266	HBS1L,MYB			18.03	3.75	3.211e-06
33	11	1900-01-06 20:44:00	5317640	C/T	0.002778	HBE1,OR51B4			18.16	3.78	3.226e-06
34	11	1900-02-03 18:14:00	5226738	A/ATT	0.003425	OR51V1,HBB			18.06	3.79	4.473e-06
35	11	1900-02-11 19:12:00	5238316	A/C	0.005747	OR51V1,HBB			18.37	3.78	5.235e-06
36	6	1900-01-05 00:44:00	135338724	C/T	0.003472	HBS1L	q23.3	benign	17.78	3.91	1.152e-05
37	6	1900-01-19 05:10:00	135424686	C/T	0.002646	HBS1L,MYB			16.74	3.78	1.62e-05
38	11	1900-01-01 12:08:00	5244388	T/TG	0.003731	OR51V1,HBB			16.81	3.78	1.862e-05
39	2	rs45606437	60723108	A/AC	0.3651	NA	NA	NA	-1.81	0.42	2.159e-05
40	6	rs151169997	135403315	T/C	0.01862	NA	NA	NA	6.28	1.46	2.761e-05
41	6	rs146293683	135494624	C/T	0.01323	NA	NA	NA	7.06	1.72	6.131e-05
42	11	1900-02-12 13:06:00	5239390	C/CT	0.003623	OR51V1,HBB			16.56	4	6.199e-05
43	6	1900-02-08 16:37:00	135323101	GTA/G	0.008772	HBS1L	q23.3	benign	12.1	2.97	8.802e-05
44	2	rs72962586	60731766	T/C	0.1455	NA	NA	NA	-2.13	0.53	8.962e-05
45	2	rs45484694	60711027	CT/C	0.266	NA	NA	NA	1.8	0.45	0.0001078
46	6	rs139624826	135315432	T/G	0.01604	NA	NA	NA	6.28	1.59	0.0001097
47	2	rs6732518	60708597	C/T	0.2963	NA	NA	NA	1.71	0.43	0.0001133
48	6	1900-02-05 07:17:00	135383757	A/AAAAAAGAAAG	0.005882	HBS1L,MYB			10.66	2.77	0.0001692
49	6	rs138256626	135345495	A/G	0.01344	NA	NA	NA	6.64	1.74	0.0001837
50	2	rs72962596	60742245	T/C	0.1429	NA	NA	NA	-2.03	0.54	0.0002165
51	2	rs6709302	60727629	A/G	0.3466	NA	NA	NA	-1.53	0.41	0.0002391
52	6	rs140289539	135418665	A/C	0.02381	NA	NA	NA	4.86	1.31	0.0002635
53	6	1900-02-05 18:20:00	135384420	CTTTT/CTTTTTTT	0.05385	HBS1L,MYB			5.01	1.33	0.000362
54	2	rs12105383	60737160	C/A	0.3598	NA	NA	NA	1.49	0.41	0.0003987
55	2	rs66488669	60734583	G/A	0.2201	NA	NA	NA	-1.58	0.44	0.0004571
56	2	rs12621957	60682447	G/A	0.3836	NA	NA	NA	-1.5	0.42	0.0004754
57	2	rs72962602	60743605	G/A	0.2222	NA	NA	NA	-1.75	0.49	0.0005037
58	11	rs111530046	5295914	C/A	0.005291	NA	NA	NA	9.55	2.73	0.0005839
59	11	rs112599588	5269790	T/C	0.005291	NA	NA	NA	9.55	2.73	0.0005839
60	11	rs112680670	5295664	T/A	0.005291	NA	NA	NA	9.55	2.73	0.0005839
61	11	rs28440105	5269799	A/C	0.005291	NA	NA	NA	9.55	2.73	0.0005839
62	11	rs74747641	5296450	C/T	0.005291	NA	NA	NA	9.55	2.73	0.0005839
63	2	1900-01-09 19:22:00	60765874	CTGTGTG/CTGTGTGTGTGTG	0.04255	BCL11A	p16.1	pathogenic	5.76	1.62	0.000603
64	2	rs72964419	60755798	T/C	0.2196	NA	NA	NA	-1.68	0.49	0.0006766
65	2	rs58789059	60736852	A/G	0.1931	NA	NA	NA	-1.67	0.49	0.000698
66	6	rs73553571	135449946	T/C	0.01058	NA	NA	NA	6.69	1.94	0.0007052
67	6	rs182246492	135455701	T/C	0.01587	NA	NA	NA	5.47	1.59	0.000738
68	2	rs72962592	60737801	T/C	0.2196	NA	NA	NA	-1.67	0.49	0.0007734
69	2	rs6740203	60740491	C/T	0.4788	NA	NA	NA	1.43	0.42	0.0007751
70	2	rs146481566	60755943	G/GTAA	0.2275	NA	NA	NA	-1.6	0.48	0.0009727
71	2	rs79059225	60755762	T/C	0.2275	NA	NA	NA	-1.6	0.48	0.0009727
72	2	rs7593947	60704933	A/T	0.1931	NA	NA	NA	1.69	0.51	0.001171
73	2	rs72964414	60750303	T/C	0.2143	NA	NA	NA	-1.67	0.51	0.001175
74	2	rs12105711	60736985	T/G	0.254	NA	NA	NA	1.45	0.45	0.001296
75	2	rs6738440	60722241	G/A	0.2884	NA	NA	NA	-1.47	0.45	0.001306
76	2	rs356976	60748945	T/C	0.1931	NA	NA	NA	1.68	0.51	0.001324
77	2	rs72962585	60729702	G/A	0.2328	NA	NA	NA	-1.53	0.47	0.001352
78	2	rs6747156	60747663	C/A	0.4444	NA	NA	NA	1.38	0.43	0.00148
79	6	1900-02-10 01:42:00	135325086	C/CT	0.005464	HBS1L	q23.3	benign	8.92	2.76	0.001484
80	2	rs1469358	60742425	C/T	0.4894	NA	NA	NA	1.34	0.42	0.00165
81	2	rs1510481	60743675	T/A	0.4894	NA	NA	NA	1.34	0.42	0.00165
82	6	rs9494142	135431640	C/T	0.1164	NA	NA	NA	1.95	0.61	0.001671
83	2	rs7340264	60736529	A/G	0.2513	NA	NA	NA	-1.46	0.46	0.001677
84	11	rs370975841	5256867	G/GA	0.01323	NA	NA	NA	5.58	1.75	0.001681
85	2	rs7581162	60704484	T/A	0.4074	NA	NA	NA	1.28	0.4	0.001739
86	6	rs138175199	135300069	G/A	0.02162	NA	NA	NA	4.45	1.4	0.001739
87	2	rs10184550	60729294	G/A	0.1984	NA	NA	NA	1.51	0.48	0.00193
88	2	rs356993	60750560	T/C	0.1949	NA	NA	NA	1.67	0.53	0.00194
89	11	rs5010979	5279153	T/C	0.007937	NA	NA	NA	7.03	2.25	0.00206
90	11	rs5010980	5279327	C/G	0.007937	NA	NA	NA	7.03	2.25	0.00206
91	11	rs5010981	5279355	C/A	0.007937	NA	NA	NA	7.03	2.25	0.00206
92	6	rs142675952	135441648	A/G	0.02116	NA	NA	NA	4.35	1.4	0.002144
93	6	rs56341813	135442435	A/G	0.02116	NA	NA	NA	4.35	1.4	0.002144
94	11	rs112127651	5286846	G/C	0.008065	NA	NA	NA	7.02	2.26	0.002203
95	2	rs77434017	60749521	C/A	0.07407	NA	NA	NA	2.14	0.69	0.002311
96	2	rs72964424	60756504	T/C	0.2169	NA	NA	NA	-1.54	0.5	0.002352
97	2	rs72964428	60756755	G/C	0.2169	NA	NA	NA	-1.54	0.5	0.002352
98	2	rs766431	60719918	G/A	0.07672	NA	NA	NA	2.17	0.71	0.002563
99	6	1900-01-13 18:41:00	135351321	A/G	0.005291	HBS1L	q23.3	benign	8.39	2.75	0.002619
100	16	rs12925761	176376	T/C	0.1693	NA	NA	NA	1.64	0.55	0.003009
101	6	rs9494145	135432552	C/T	0.02128	NA	NA	NA	4.2	1.4	0.003014
102	2	rs17331129	60679942	C/T	0.1508	NA	NA	NA	1.64	0.55	0.003248
103	2	rs168565	60744331	A/G	0.4868	NA	NA	NA	1.26	0.42	0.003311
104	2	rs45595933	60755763	A/G	0.1376	NA	NA	NA	1.64	0.55	0.003313
105	6	1900-01-10 20:58:00	109001666	T/C	0.007937	FOXO3	q21	benign	6.69	2.25	0.003397
106	2	rs6545820	60742572	T/C	0.4894	NA	NA	NA	-1.19	0.4	0.003507
107	6	rs142744772	135313389	T/C	0.02116	NA	NA	NA	4.14	1.4	0.003517
108	6	rs148203858	135320029	T/C	0.02116	NA	NA	NA	4.14	1.4	0.003517
109	2	rs58642035	60757130	C/A	0.2116	NA	NA	NA	-1.5	0.51	0.003613
110	2	rs356979	60747743	T/C	0.4365	NA	NA	NA	1.29	0.44	0.003643
111	2	rs356991	60744872	T/G	0.4365	NA	NA	NA	1.29	0.44	0.003643
112	11	1900-01-04 14:11:00	5248831	T/A	0.03988	HBB			3.37	1.14	0.003661
113	16	rs2541609	178051	C/T	0.1746	NA	NA	NA	1.6	0.54	0.003679
114	6	rs150675173	135479404	T/C	0.03175	NA	NA	NA	3.37	1.16	0.003973
115	6	1900-01-31 08:42:00	135376642	T/TC	0.02394	HBS1L	q23.3	benign	3.85	1.33	0.00419
116	6	1900-01-24 16:17:00	135301481	A/AAAG	0.02381	HBS1L	q23.3	benign	3.83	1.32	0.004263
117	6	rs138460788	135311573	C/A	0.02381	NA	NA	NA	3.83	1.32	0.004263
118	6	rs143340527	135313204	G/T	0.02381	NA	NA	NA	3.83	1.32	0.004263
119	6	rs145591376	135366404	G/C	0.02381	NA	NA	NA	3.83	1.32	0.004263
120	6	rs146778536	135388686	A/G	0.02381	NA	NA	NA	3.83	1.32	0.004263
121	6	rs192484231	135337244	C/G	0.02381	NA	NA	NA	3.83	1.32	0.004263
122	6	rs55720831	135380742	G/C	0.02381	NA	NA	NA	3.83	1.32	0.004263
123	2	rs77406335	60696528	C/T	0.06614	NA	NA	NA	-2.31	0.8	0.004286
124	6	rs61593090	135488083	A/G	0.09524	NA	NA	NA	1.95	0.67	0.004311
125	6	rs144508756	135343302	T/C	0.02116	NA	NA	NA	4.05	1.4	0.004336
126	6	rs56185742	135382789	T/C	0.02406	NA	NA	NA	3.83	1.33	0.004413
127	11	rs968857	5260458	T/C	0.03968	NA	NA	NA	3	1.04	0.004499
128	6	rs9399136	135402339	C/T	0.007979	NA	NA	NA	6.5	2.26	0.004554
129	2	rs138451308	60774065	A/G	0.01058	NA	NA	NA	5.62	1.96	0.004635
130	11	rs4320977	5258162	A/G	0.04142	NA	NA	NA	2.93	1.02	0.004719
131	11	rs10128556	5263683	T/C	0.005291	NA	NA	NA	7.88	2.76	0.004744
132	11	rs11036641	5310578	G/A	0.005291	NA	NA	NA	7.88	2.76	0.004744
133	11	rs139559716	5314514	GGTTTCACT/G	0.005291	NA	NA	NA	7.88	2.76	0.004744
134	11	rs145323148	5284010	C/T	0.005291	NA	NA	NA	7.88	2.76	0.004744
135	11	rs2071348	5264146	G/T	0.005291	NA	NA	NA	7.88	2.76	0.004744
136	11	rs2855121	5277291	T/C	0.005291	NA	NA	NA	7.88	2.76	0.004744
137	11	rs34501951	5280839	T/TA	0.005291	NA	NA	NA	7.88	2.76	0.004744
138	11	rs3759074	5257778	A/G	0.005291	NA	NA	NA	7.88	2.76	0.004744
139	11	rs72872549	5290053	T/C	0.005291	NA	NA	NA	7.88	2.76	0.004744
140	11	rs72872555	5310169	A/G	0.005291	NA	NA	NA	7.88	2.76	0.004744
141	11	rs7482144	5276169	A/G	0.005291	NA	NA	NA	7.88	2.76	0.004744
142	6	rs150265192	135419322	G/C	0.005988	NA	NA	NA	7.88	2.79	0.005333
143	11	rs10768684	5248842	G/A	0.03106	NA	NA	NA	3.65	1.3	0.005643
144	2	rs72964457	60777216	A/G	0.1561	NA	NA	NA	-1.55	0.56	0.006134
145	6	rs55662963	135426597	A/G	0.08466	NA	NA	NA	1.94	0.7	0.006439
146	6	rs55997259	135426452	G/A	0.08466	NA	NA	NA	1.94	0.7	0.006439
147	11	rs112937703	5248840	A/ATG	0.02326	NA	NA	NA	3.92	1.42	0.006571
148	6	rs7770417	135424774	A/G	0.1164	NA	NA	NA	1.69	0.62	0.006674
149	2	rs35507444	60681754	G/A	0.06349	NA	NA	NA	2.08	0.76	0.006693
150	2	rs13420461	60714889	A/G	0.02381	NA	NA	NA	-3.62	1.33	0.006954
151	6	1900-01-01 21:05:00	135465257	A/G	0.005291	HBS1L,MYB			7.53	2.76	0.007047
152	6	1900-01-22 23:41:00	135495653	G/GTTAT	0.005291	HBS1L,MYB			7.53	2.76	0.007047
153	11	rs4910740	5287290	G/A	0.03704	NA	NA	NA	2.94	1.08	0.007098
154	2	1900-01-29 11:04:00	60728640	CTTTT/CTTTTTT	0.2283	BCL11A	p16.1	pathogenic	3.05	1.08	0.007166
155	11	rs7119261	5249011	C/A	0.005319	NA	NA	NA	7.5	2.76	0.007246
156	2	rs142703633	60723034	TA/T	0.0291	NA	NA	NA	-3.28	1.21	0.007271
157	2	rs74644352	60720769	A/G	0.0291	NA	NA	NA	-3.28	1.21	0.007271
158	2	rs77330833	60722971	A/C	0.0291	NA	NA	NA	-3.28	1.21	0.007271
159	2	rs77374908	60723173	A/G	0.0291	NA	NA	NA	-3.28	1.21	0.007271
160	11	rs11036238	5225635	C/G	0.005291	NA	NA	NA	7.48	2.76	0.007447
161	11	rs3813727	5255912	A/G	0.03704	NA	NA	NA	2.92	1.08	0.007572
162	6	rs11757217	108882570	T/C	0.2407	NA	NA	NA	1.25	0.46	0.007614
163	11	1900-01-04 14:02:00	5248822	GAAAA/GA	0.02134	HBB			4.06	1.51	0.007991
164	2	rs4672393	60697654	A/C	0.3413	NA	NA	NA	-1.21	0.45	0.008054
165	11	rs57966301	5271582	T/A	0.01323	NA	NA	NA	4.71	1.76	0.008161
166	2	rs13019832	60710571	A/G	0.3862	NA	NA	NA	-1.09	0.41	0.008252
167	6	rs9376090	135411228	C/T	0.005291	NA	NA	NA	7.38	2.77	0.008307
168	2	rs28366455	60745396	C/T	0.4603	NA	NA	NA	1.1	0.41	0.008376
169	6	rs60323739	135427419	A/G	0.1005	NA	NA	NA	1.76	0.66	0.008548
170	6	rs12664956	135384188	C/T	0.1508	NA	NA	NA	-1.64	0.62	0.008642
171	2	rs113671572	60680796	T/C	0.06085	NA	NA	NA	2.3	0.87	0.008728
172	6	rs62429819	135490468	T/A	0.0663	NA	NA	NA	2.15	0.81	0.008788
173	6	rs3752383	135522755	G/A	0.09259	NA	NA	NA	1.86	0.7	0.009111
174	2	rs6740172	60740323	G/A	0.2381	NA	NA	NA	1.22	0.46	0.00924
175	2	rs6545818	60738986	A/G	0.2778	NA	NA	NA	1.13	0.43	0.009967
176	6	rs13214669	135299959	C/T	0.1402	NA	NA	NA	-1.56	0.6	0.01028
177	16	rs8047658	175727	T/C	0.1693	NA	NA	NA	1.41	0.55	0.01104
178	11	rs10837774	5323388	A/G	0.007937	NA	NA	NA	5.81	2.27	0.0112
179	11	rs12270279	5322101	T/C	0.007937	NA	NA	NA	5.81	2.27	0.0112
180	11	rs12283334	5322520	A/G	0.007937	NA	NA	NA	5.81	2.27	0.0112
181	11	rs72886289	5323534	T/C	0.007937	NA	NA	NA	5.81	2.27	0.0112
182	2	rs77648855	60715449	A/G	0.01587	NA	NA	NA	-4.13	1.62	0.01138
183	2	rs78194722	60720103	G/C	0.01587	NA	NA	NA	-4.13	1.62	0.01138
184	11	1900-02-04 05:54:00	5292974	*/A	0.1893	HBE1,OR51B4			1.06	0.42	0.01189
185	11	rs968856	5260576	T/C	0.04396	NA	NA	NA	2.59	1.02	0.01216
186	6	rs201339576	135493573	A/C	0.01235	NA	NA	NA	5.04	1.99	0.0124
187	6	rs55683605	135487107	T/C	0.05556	NA	NA	NA	2.16	0.86	0.01278
188	2	rs6545819	60739061	T/A	0.2725	NA	NA	NA	1.13	0.45	0.01292
189	6	rs376676503	135494556	CAGATAGAT/CAGAT	0.1127	NA	NA	NA	-1.99	0.79	0.01292
190	6	rs9321486	135447820	T/C	0.2513	NA	NA	NA	1.23	0.49	0.01318
191	2	1900-01-10 14:36:00	60767028	T/C	0.007937	BCL11A	p16.1	pathogenic	5.67	2.27	0.01328
192	6	rs2026938	135444009	A/G	0.3624	NA	NA	NA	-1.04	0.42	0.01346
193	6	rs142921117	135461016	A/G	0.01852	NA	NA	NA	3.73	1.5	0.01388
194	6	rs145367038	135467917	G/C	0.01852	NA	NA	NA	3.73	1.5	0.01388
195	6	rs146052332	135466086	G/A	0.01852	NA	NA	NA	3.73	1.5	0.01388
196	6	rs150205157	135452752	C/T	0.01852	NA	NA	NA	3.73	1.5	0.01388
197	2	1900-02-09 21:05:00	60745081	CACATGATGATGTCACACATAT/C	0.04696	BCL11A	p16.1	pathogenic	2.46	0.99	0.01418
198	2	rs6724431	60736837	C/T	0.3201	NA	NA	NA	0.96	0.39	0.01441
199	2	rs7340410	60738667	T/G	0.2725	NA	NA	NA	1.1	0.45	0.01441
200	19	rs149022596	12995677	T/A	0.007937	NA	NA	NA	5.61	2.27	0.01444
201	2	1900-01-11 10:15:00	60768207	T/C	0.01852	BCL11A	p16.1	pathogenic	-3.7	1.5	0.01464
202	11	rs10637609	5256849	AAG/A	0.01323	NA	NA	NA	4.34	1.77	0.01492
203	11	rs9665964	5256843	C/G	0.01323	NA	NA	NA	4.34	1.77	0.01492
204	2	rs137895462	60681179	A/AAG	0.4048	NA	NA	NA	1.77	0.72	0.01511
205	6	1900-01-20 17:24:00	135295788	CAA/CA	0.2946	HBS1L	q23.3	benign	-1.28	0.52	0.01513
206	11	rs10488679	5260936	G/A	0.01587	NA	NA	NA	3.96	1.62	0.01539
207	6	rs6940878	135366309	A/G	0.0873	NA	NA	NA	-1.82	0.75	0.01604
208	2	rs12477097	60698397	C/A	0.3175	NA	NA	NA	-1.15	0.48	0.01617
209	6	rs56329496	135530039	A/C	0.08201	NA	NA	NA	1.79	0.74	0.01636
210	11	rs7130110	5296104	C/G	0.02116	NA	NA	NA	3.41	1.41	0.01667
211	6	rs199879427	135417578	C/CATT	0.07181	NA	NA	NA	1.8	0.75	0.01744
212	2	rs147237222	60771011	G/A	0.01323	NA	NA	NA	-4.24	1.77	0.01748
213	2	rs114566772	60772979	C/G	0.06349	NA	NA	NA	2.04	0.85	0.0176
214	2	1900-01-15 19:26:00	60774518	C/CT	0.2306	BCL11A	p16.1	pathogenic	1.41	0.59	0.01773
215	6	rs7757054	135487614	G/A	0.08466	NA	NA	NA	1.74	0.73	0.01803
216	2	rs144395176	60709900	T/C	0.01323	NA	NA	NA	-4.22	1.77	0.01804
217	2	1900-01-22 15:14:00	60718810	A/AAAAAAAG	0.01351	BCL11A	p16.1	pathogenic	-4.24	1.78	0.01817
218	6	rs60578126	135436334	G/A	0.07527	NA	NA	NA	1.84	0.77	0.01832
219	6	1900-02-13 21:32:00	135527204	G/C	0.04696	MYB	q23.3	benign	-2.23	0.94	0.01888
220	2	rs77924806	60765876	*/G	0.1262	NA	NA	NA	1.89	0.79	0.01906
221	2	rs75468792	60728156	G/C	0.08466	NA	NA	NA	1.64	0.69	0.01912
222	16	rs62032626	176157	T/C	0.164	NA	NA	NA	1.31	0.55	0.01916
223	11	rs113622787	5276282	G/A	0.03175	NA	NA	NA	2.73	1.17	0.02013
224	6	rs185003621	135494066	A/C	0.03175	NA	NA	NA	2.71	1.17	0.02097
225	6	rs73550894	135400230	C/T	0.06878	NA	NA	NA	1.77	0.76	0.02114
226	16	rs8051955	175726	A/G	0.1349	NA	NA	NA	1.45	0.62	0.02146
227	11	rs3759067	5292192	C/T	0.01323	NA	NA	NA	4.1	1.77	0.02178
228	2	1900-01-22 15:28:00	60718824	GA/GAA	0.3594	BCL11A	p16.1	pathogenic	2.29	0.98	0.02208
229	11	rs11827654	5272521	A/G	0.03352	NA	NA	NA	2.71	1.18	0.02244
230	11	rs6578588	5252251	T/C	0.01058	NA	NA	NA	4.55	1.98	0.02248
231	2	rs4672394	60698461	T/C	0.3095	NA	NA	NA	-1.12	0.49	0.02258
232	11	rs12295158	5252794	A/G	0.03968	NA	NA	NA	2.4	1.05	0.02364
233	2	rs72960699	60684034	C/T	0.05291	NA	NA	NA	-2	0.88	0.02384
234	6	1900-01-09 20:47:00	135345687	GTT/GTTT	0.395	HBS1L	q23.3	benign	-1.19	0.52	0.02412
235	19	1900-01-14 15:01:00	12996049	C/T	0.005291	KLF1	p13.13	pathogenic	6.32	2.78	0.0242
236	6	1900-02-07 02:42:00	135386362	C/T	0.002646	HBS1L,MYB			8.9	3.92	0.0244
237	6	1900-02-11 23:20:00	135458896	T/C	0.002646	HBS1L,MYB			8.9	3.92	0.0244
238	6	rs9399140	135448643	C/T	0.3942	NA	NA	NA	-0.92	0.41	0.02543
239	6	rs2223385	135435171	A/G	0.4259	NA	NA	NA	-0.9	0.4	0.02578
240	11	rs73404550	5323594	G/T	0.02116	NA	NA	NA	3.17	1.41	0.02598
241	6	rs34125490	135289905	*/AC	0.03977	NA	NA	NA	-2.33	1.04	0.02607
242	11	rs4283007	5258490	A/T	0.01323	NA	NA	NA	3.98	1.77	0.02613
243	6	rs73774555	135368034	A/C	0.1295	NA	NA	NA	1.44	0.65	0.02733
244	11	rs12222763	5253477	G/C	0.03439	NA	NA	NA	2.5	1.13	0.02747
245	11	rs5789380	5253462	TATAAAAA/T	0.03439	NA	NA	NA	2.5	1.13	0.02747
246	11	rs201200424	5243357	C/CT	0.3691	NA	NA	NA	-0.97	0.44	0.02763
247	2	rs77662111	60737401	T/C	0.1296	NA	NA	NA	1.3	0.59	0.02801
248	11	1900-01-12 00:38:00	5259538	TCA/T	0.002825	HBD,HBBP1			8.81	3.98	0.02821
249	6	rs78602190	135451819	G/A	0.1799	NA	NA	NA	1.18	0.54	0.0284
250	6	1900-01-20 03:52:00	135294976	GA/GAA	0.4108	HBS1L	q23.3	benign	-1.82	0.83	0.02867
251	11	rs10837643	5258038	T/A	0.0625	NA	NA	NA	1.65	0.75	0.02882
252	6	rs139114703	135349635	C/CAT	0.1349	NA	NA	NA	-1.41	0.64	0.02906
253	6	rs1022506	135511587	A/G	0.07937	NA	NA	NA	1.65	0.75	0.02914
254	6	rs12660713	135517996	A/G	0.07937	NA	NA	NA	1.65	0.75	0.02914
255	6	rs112749262	135510915	C/CTTTA	0.02116	NA	NA	NA	3.11	1.41	0.02925
256	6	rs141140896	135509328	C/G	0.02116	NA	NA	NA	3.11	1.41	0.02925
257	6	rs144157729	135477906	C/T	0.02116	NA	NA	NA	3.11	1.41	0.02925
258	6	1900-01-13 21:40:00	135285964	*/A	0.1158	HBS1L	q23.3	benign	1.38	0.63	0.02946
259	6	1899-12-31 07:20:00	135397456	A/T	0.002857	HBS1L,MYB			8.82	4.02	0.02946
260	6	1900-01-11 17:28:00	135348368	C/A	0.003226	HBS1L	q23.3	benign	8.82	4.04	0.03046
261	2	1900-01-20 01:35:00	60780647	GGAAAAAAAAAAAAAAAAAAA/G	0.003145	BCL11A	p16.1	pathogenic	8.82	4.05	0.03089
262	2	1900-01-09 19:02:00	60765854	GTC/GTCTCTC	0.05189	BCL11A	p16.1	pathogenic	-2.2	1.01	0.03131
263	11	rs7935971	5292823	G/A	0.03704	NA	NA	NA	2.35	1.09	0.03176
264	2	rs1123573	60707588	G/A	0.4074	NA	NA	NA	-0.91	0.42	0.03252
265	6	rs41294868	135523786	A/G	0.07672	NA	NA	NA	1.64	0.76	0.03254
266	11	rs11329694	5267384	A/AC	0.02116	NA	NA	NA	3.04	1.42	0.03287
267	11	rs6578594	5293625	A/T	0.02116	NA	NA	NA	3.04	1.42	0.03287
268	11	rs7479652	5293113	T/C	0.02116	NA	NA	NA	3.04	1.42	0.03287
269	6	1900-01-17 23:48:00	135488460	A/AAAAAAG	0.1013	HBS1L,MYB			1.68	0.78	0.03306
270	16	rs149164538	172009	T/G	0.005291	NA	NA	NA	5.96	2.78	0.03349
271	6	rs41294858	135412636	C/T	0.127	NA	NA	NA	-1.26	0.59	0.03399
272	6	rs34825830	135383218	T/TAAA	0.1561	NA	NA	NA	-1.28	0.6	0.03412
273	6	rs10457631	135445179	C/A	0.2937	NA	NA	NA	-0.96	0.45	0.03421
274	11	rs41468147	5268752	C/T	0.02381	NA	NA	NA	2.85	1.34	0.03429
275	11	rs7104281	5267222	A/G	0.02381	NA	NA	NA	2.85	1.34	0.03429
276	2	rs139422069	60751150	C/CA	0.08466	NA	NA	NA	1.46	0.69	0.03453
277	2	rs74958177	60717776	G/A	0.03439	NA	NA	NA	-2.39	1.13	0.03488
278	6	1900-01-06 08:42:00	135406178	GTTTTG/TTTTTG	0.02941	HBS1L,MYB			2.03	0.95	0.03505
279	11	rs4426158	5258429	T/C	0.02116	NA	NA	NA	2.44	1.15	0.03506
280	6	rs4896122	135295081	C/T	0.2516	NA	NA	NA	-1.11	0.52	0.03519
281	2	rs114615813	60736492	T/C	0.08466	NA	NA	NA	1.46	0.69	0.03531
282	2	rs115397838	60737314	T/C	0.08466	NA	NA	NA	1.46	0.69	0.03531
283	11	rs2855037	5272397	C/A	0.02646	NA	NA	NA	2.69	1.27	0.03574
284	11	rs59495893	5274126	A/C	0.02646	NA	NA	NA	2.69	1.27	0.03574
285	11	rs112479156	5276320	C/T	0.0291	NA	NA	NA	2.57	1.22	0.03588
286	11	rs112760631	5274967	C/T	0.0291	NA	NA	NA	2.57	1.22	0.03588
287	11	rs113047906	5274708	T/C	0.0291	NA	NA	NA	2.57	1.22	0.03588
288	11	rs113425530	5274720	A/C	0.0291	NA	NA	NA	2.57	1.22	0.03588
289	11	rs1143541	5269330	A/T	0.0291	NA	NA	NA	2.57	1.22	0.03588
290	11	rs11820733	5281264	A/G	0.0291	NA	NA	NA	2.57	1.22	0.03588
291	11	rs11826265	5273525	C/A	0.0291	NA	NA	NA	2.57	1.22	0.03588
292	11	rs11826304	5282474	T/C	0.0291	NA	NA	NA	2.57	1.22	0.03588
293	11	rs11827946	5281269	G/A	0.0291	NA	NA	NA	2.57	1.22	0.03588
294	11	rs183504559	5274949	G/C	0.0291	NA	NA	NA	2.57	1.22	0.03588
295	11	rs7102446	5284254	T/C	0.0291	NA	NA	NA	2.57	1.22	0.03588
296	11	rs73402629	5271739	A/C	0.0291	NA	NA	NA	2.57	1.22	0.03588
297	11	rs2402330	5269465	T/A	0.02116	NA	NA	NA	2.99	1.42	0.03603
298	6	1900-01-22 05:46:00	135494578	GATAGATAGATAGATAGATAC/G	0.04286	HBS1L,MYB			2.12	1	0.03608
299	11	rs16911998	5257700	A/G	0.01852	NA	NA	NA	3.18	1.51	0.03629
300	11	rs16912175	5262232	T/C	0.01852	NA	NA	NA	3.18	1.51	0.03629
301	11	rs7105491	5267339	T/C	0.01852	NA	NA	NA	3.18	1.51	0.03629
302	11	rs7131145	5266797	A/G	0.01852	NA	NA	NA	3.18	1.51	0.03629
303	11	rs74910558	5264922	G/C	0.01852	NA	NA	NA	3.18	1.51	0.03629
304	11	rs77786719	5250185	T/G	0.01852	NA	NA	NA	3.18	1.51	0.03629
305	11	rs80138317	5255900	T/C	0.01852	NA	NA	NA	3.18	1.51	0.03629
306	11	rs7118981	5258238	A/G	0.01862	NA	NA	NA	3.19	1.51	0.03644
307	11	rs77044643	5255075	C/A	0.01892	NA	NA	NA	3.18	1.51	0.03647
308	6	1900-01-23 08:01:00	135496153	A/AAAAAG	0.02557	HBS1L,MYB			2.86	1.36	0.03649
309	6	rs4594969	135285586	T/A	0.2261	NA	NA	NA	-1.08	0.51	0.03655
310	19	1900-02-03 23:26:00	4046922	A/G	0.02486	ZBTB7A			2.85	1.35	0.03688
311	6	1900-01-04 13:18:00	135534646	GTAATACT/ATAATACT	0.07754	MYB	q23.3	benign	1.6	0.76	0.03703
312	6	rs190536695	135330921	A/G	0.01812	NA	NA	NA	3.93	1.87	0.03744
313	6	rs12663810	135289782	C/G	0.1461	NA	NA	NA	-1.32	0.63	0.03757
314	6	rs9389271	135433404	T/C	0.4176	NA	NA	NA	-0.85	0.41	0.03777
315	2	rs150918139	60770653	G/C	0.0582	NA	NA	NA	1.86	0.89	0.038
316	2	1900-01-03 05:44:00	60756416	C/G	0.002646	BCL11A	p16.1	pathogenic	8.19	3.93	0.0384
317	6	1900-01-23 17:40:00	135431196	C/A	0.002646	HBS1L,MYB			8.19	3.93	0.0384
318	11	rs10488677	5261470	T/G	0.02116	NA	NA	NA	2.95	1.42	0.03856
319	11	rs10488678	5261374	A/G	0.02116	NA	NA	NA	2.95	1.42	0.03856
320	11	rs10488681	5259768	G/A	0.02116	NA	NA	NA	2.95	1.42	0.03856
321	11	rs16911934	5251478	C/T	0.02116	NA	NA	NA	2.95	1.42	0.03856
322	11	rs73400685	5251134	G/A	0.02116	NA	NA	NA	2.95	1.42	0.03856
323	11	rs73402604	5259959	G/A	0.02116	NA	NA	NA	2.95	1.42	0.03856
324	2	rs115134715	60780044	T/C	0.05026	NA	NA	NA	-1.87	0.9	0.03858
325	11	rs16911905	5249290	G/C	0.02139	NA	NA	NA	2.95	1.42	0.03872
326	6	rs9376094	135445814	A/T	0.4206	NA	NA	NA	-0.85	0.41	0.0393
327	11	rs10488680	5260067	T/C	0.01587	NA	NA	NA	3.37	1.63	0.03937
328	11	rs73402606	5260110	C/A	0.01587	NA	NA	NA	3.37	1.63	0.03937
329	11	rs73402607	5260122	C/A	0.01587	NA	NA	NA	3.37	1.63	0.03937
330	11	rs10608857	5267138	A/ATAC	0.01892	NA	NA	NA	3.15	1.52	0.03952
331	6	rs1320959	135437386	T/C	0.1915	NA	NA	NA	1.05	0.5	0.03968
332	2	rs10631738	60704735	TGAAAG/T	0.358	NA	NA	NA	-0.97	0.47	0.03971
333	2	rs112371535	60715937	C/CG	0.03175	NA	NA	NA	-2.42	1.17	0.03971
334	11	rs12788935	5226469	G/T	0.002717	NA	NA	NA	8.15	3.94	0.04
335	11	rs12788941	5226471	A/T	0.002717	NA	NA	NA	8.15	3.94	0.04
336	2	rs112727722	60729173	A/G	0.1534	NA	NA	NA	1.15	0.55	0.04003
337	6	rs7738267	135537193	G/A	0.3254	NA	NA	NA	0.87	0.42	0.04004
338	2	1900-02-09 21:02:00	60745078	TCCCAATG/T	0.04945	BCL11A	p16.1	pathogenic	2.04	0.98	0.04014
339	6	rs59792276	135364024	C/T	0.1383	NA	NA	NA	1.23	0.59	0.04018
340	11	1900-01-23 08:06:00	5275826	T/G	0.02247	HBG2	p15.4	pathogenic	2.94	1.43	0.04048
341	11	1900-01-23 08:07:00	5275827	T/G	0.02247	HBG2	p15.4	pathogenic	2.94	1.43	0.04048
342	11	rs112215533	5276380	C/G	0.02381	NA	NA	NA	2.76	1.34	0.0407
343	11	rs139821845	5283903	C/G	0.02381	NA	NA	NA	2.76	1.34	0.0407
344	11	rs73402631	5273060	C/G	0.02381	NA	NA	NA	2.76	1.34	0.0407
345	11	rs73402654	5281315	G/T	0.02381	NA	NA	NA	2.76	1.34	0.0407
346	11	rs73402665	5285993	T/C	0.02381	NA	NA	NA	2.76	1.34	0.0407
347	11	rs73402668	5287551	C/T	0.02381	NA	NA	NA	2.76	1.34	0.0407
348	11	rs111838663	5256504	G/T	0.002646	NA	NA	NA	8.09	3.93	0.04087
349	11	rs112336602	5290597	C/T	0.002646	NA	NA	NA	8.09	3.93	0.04087
350	11	rs138720077	5289228	AGTTTT/A	0.002646	NA	NA	NA	8.09	3.93	0.04087
351	11	rs2855039	5271671	T/C	0.002646	NA	NA	NA	8.09	3.93	0.04087
352	2	1900-01-26 16:39:00	60724655	C/T	0.002646	BCL11A	p16.1	pathogenic	8.09	3.93	0.04087
353	6	1900-01-23 18:53:00	135300197	C/G	0.002646	HBS1L	q23.3	benign	8.09	3.93	0.04087
354	6	1900-02-14 08:42:00	135396802	G/GT	0.002646	HBS1L,MYB			8.09	3.93	0.04087
355	6	rs10484494	135430093	A/G	0.002646	NA	NA	NA	8.09	3.93	0.04087
356	6	rs139656602	135364212	G/GA	0.002646	NA	NA	NA	8.09	3.93	0.04087
357	6	rs41294864	135438623	G/A	0.002646	NA	NA	NA	8.09	3.93	0.04087
358	6	rs72972197	135352337	C/T	0.005291	NA	NA	NA	4.05	1.97	0.04087
359	6	rs72974176	135441748	T/C	0.002646	NA	NA	NA	8.09	3.93	0.04087
360	2	rs57186683	60732690	G/A	0.1481	NA	NA	NA	1.17	0.57	0.04105
361	2	rs74543787	60734784	G/C	0.1481	NA	NA	NA	1.17	0.57	0.04105
362	2	1900-01-22 14:31:00	60718767	C/T	0.007937	BCL11A	p16.1	pathogenic	4.69	2.28	0.04115
363	11	rs61080176	5269992	A/ACACACACACGCGCGCGCG	0.00266	NA	NA	NA	8.07	3.93	0.04138
364	11	rs75257741	5299150	T/A	0.01323	NA	NA	NA	3.65	1.78	0.04154
365	2	rs137866865	60751033	C/A	0.09259	NA	NA	NA	1.33	0.65	0.04222
366	6	1900-02-05 23:58:00	135515830	G/GT	0.002688	MYB	q23.3	benign	8.04	3.94	0.0426
367	11	1900-02-03 14:50:00	5292070	CTT/CT	0.08108	HBE1	p15.4		-1.6	0.79	0.04273
368	2	rs115917401	60748487	A/G	0.06085	NA	NA	NA	-1.7	0.83	0.0428
369	2	rs116579637	60746211	A/C	0.06085	NA	NA	NA	-1.7	0.83	0.0428
370	2	1899-12-31 14:13:00	60687069	TTC/TTCTC	0.06417	BCL11A	p16.1	pathogenic	1.78	0.87	0.04283
371	6	rs115059005	135473694	C/G	0.25	HBS1L,MYB			1.83	0.39	0.04301
372	2	rs148893646	60723153	A/C	0.01058	NA	NA	NA	-4.04	1.98	0.04305
373	6	rs9321495	135528605	G/C	0.02381	NA	NA	NA	2.72	1.34	0.04335
374	6	1900-02-10 09:57:00	135391117	ATTTT/ATTTTT	0.2419	HBS1L,MYB			2.03	0.98	0.04343
375	11	rs151148651	5227269	C/CT	0.002941	NA	NA	NA	8.13	4	0.04366
376	6	rs210944	135535018	G/A	0.005291	NA	NA	NA	5.66	2.79	0.04372
377	2	rs7577014	60779840	A/G	0.3757	NA	NA	NA	0.8	0.39	0.04395
378	6	1900-01-17 23:44:00	135488456	A/AAAAAAAAAAG	0.005682	HBS1L,MYB			5.74	2.83	0.04429
379	11	rs3061878	5249688	C/CAAAAT	0.02151	NA	NA	NA	2.86	1.41	0.04454
380	2	rs62142646	60726427	T/C	0.119	NA	NA	NA	-1.25	0.62	0.04466
381	19	1900-02-03 13:44:00	4046340	G/GT	0.1635	ZBTB7A			1.39	0.69	0.04467
382	16	rs7190975	172299	A/C	0.1037	NA	NA	NA	-1.34	0.66	0.04477
383	6	1900-01-26 08:34:00	135303898	C/T	0.003125	HBS1L	q23.3	benign	8.13	4.03	0.04555
384	6	rs143741069	135356746	A/G	0.03191	NA	NA	NA	2.35	1.17	0.04578
385	2	rs17028290	60683373	G/A	0.2857	NA	NA	NA	-0.9	0.45	0.04665
386	6	1900-02-06 10:09:00	135450905	GTT/GT	0.2987	HBS1L,MYB			1.2	0.6	0.04681
387	11	rs4910543	5258827	G/C	0.01892	NA	NA	NA	2.67	1.33	0.04685
388	6	1900-01-17 23:50:00	135488462	AAAG/AAAAGAAG	0.1993	HBS1L,MYB			1.26	0.63	0.04693
389	11	rs141758702	5311350	G/GTCTA	0.03968	NA	NA	NA	2.11	1.06	0.04696
390	11	rs11036485	5279040	A/T	0.04233	NA	NA	NA	1.92	0.96	0.04698
391	16	rs139776004	171451	T/C	0.1032	NA	NA	NA	-1.32	0.66	0.04731
392	16	rs141403187	177181	C/T	0.1032	NA	NA	NA	-1.32	0.66	0.04731
393	16	rs146101157	172152	G/A	0.1032	NA	NA	NA	-1.32	0.66	0.04731
394	16	rs7195934	172359	C/G	0.1032	NA	NA	NA	-1.32	0.66	0.04731
395	6	1900-01-26 18:56:00	135304520	C/T	0.005291	HBS1L	q23.3	benign	5.56	2.79	0.04766
396	6	1900-01-04 15:01:00	135403677	T/G	0.005291	HBS1L,MYB			5.56	2.79	0.04766
397	6	1900-01-22 22:06:00	135430022	T/C	0.005291	HBS1L,MYB			5.56	2.79	0.04766
398	6	1900-01-11 14:59:00	135479291	A/C	0.005291	HBS1L,MYB			5.56	2.79	0.04766
399	11	1900-01-07 04:19:00	5252559	CTT/CT	0.0221	HBB,HBD			2.85	1.43	0.04806
400	2	rs116440337	60770895	T/C	0.07672	NA	NA	NA	1.57	0.79	0.04818
401	6	1900-01-01 16:11:00	135399427	TAAAA/TAAAAAA	0.4623	HBS1L,MYB			2.01	1	0.04845
402	6	rs112476323	135336812	T/C	0.1386	NA	NA	NA	1.23	0.62	0.04859
403	19	rs10407416	12997733	G/C	0.0291	NA	NA	NA	2.42	1.22	0.04873
404	2	1900-02-07 17:52:00	60742008	GAAAA/GAAA	0.3992	BCL11A	p16.1	pathogenic	-1.38	0.69	0.04886
405	11	rs4910735	5258852	G/A	0.01955	NA	NA	NA	2.66	1.34	0.04888
406	6	rs189704496	135345345	A/G	0.04118	NA	NA	NA	1.94	0.98	0.04906
407	11	1900-01-11 18:22:00	5259162	C/T	0.002646	HBD,HBBP1			7.79	3.93	0.04909
408	11	1900-02-02 09:04:00	5290284	A/AT	0.002646	HBE1	p15.4		7.79	3.93	0.04909
409	2	1900-01-25 15:29:00	60723145	A/C	0.002646	BCL11A	p16.1	pathogenic	7.79	3.93	0.04909
410	2	1900-01-27 14:42:00	60725978	C/T	0.002646	BCL11A	p16.1	pathogenic	7.79	3.93	0.04909
411	6	1900-01-06 22:55:00	135341495	G/T	0.002646	HBS1L	q23.3	benign	7.79	3.93	0.04909
412	6	1900-02-10 01:31:00	135456147	GA/G	0.002646	HBS1L,MYB			7.79	3.93	0.04909
413	6	rs1411919	135432061	G/A	0.3995	NA	NA	NA	-0.8	0.41	0.04967
414	Logistic association test of VOC SCA samples
415	CHRA417:K433A417:K439A417:K445A41A417:K487	SNP	BP	A1/A2	MAF	Gene	Band	Clinical	OR	SE	P
416	16	rs2562163	176841	G/A	0.2037	NA	NA	NA	0.34	-0.1	0.0004648
417	6	rs139095739	135429233	C/T	0.2832	NA	NA	NA	2.7	0.82	0.0009377
418	6	rs28373149	135439051	C/A	0.2884	NA	NA	NA	2.59	0.79	0.001123
419	6	1900-01-17 23:48:00	135488460	A/AAAAAAG	0.1013	HBS1L,MYB			0.27	-0.08	0.001446
420	6	rs74596334	135432005	T/C	0.2831	NA	NA	NA	2.47	0.79	0.001768
421	6	rs77210461	135429466	A/G	0.1481	NA	NA	NA	4.16	1.34	0.001973
422	6	rs1074849	135423412	A/G	0.1534	NA	NA	NA	0.4	-0.13	0.002137
423	6	rs9373124	135423209	C/T	0.4947	NA	NA	NA	1.97	0.66	0.002684
424	6	rs77319487	135410982	G/A	0.04762	NA	NA	NA	0.21	-0.07	0.002718
425	6	rs35959442	135424179	G/C	0.3942	NA	NA	NA	2.1	0.7	0.002912
426	6	rs111524707	135438971	T/C	0.04762	NA	NA	NA	0.22	-0.07	0.003023
427	6	1900-01-09 18:57:00	135345577	CAAAAAAAAAAA/CAAAAAAAAA	0.1264	HBS1L	q23.3	benign	0.35	-0.12	0.003106
428	6	rs12205603	135500087	C/G	0.2619	NA	NA	NA	0.49	-0.17	0.003959
429	6	rs7758845	135428537	C/A	0.3995	NA	NA	NA	2.02	0.7	0.004032
430	6	rs11759553	135422296	T/A	0.3889	NA	NA	NA	2.01	0.71	0.004507
431	6	rs9494139	135414793	G/A	0.05026	NA	NA	NA	0.25	-0.09	0.004808
432	6	rs6920211	135431318	C/T	0.3968	NA	NA	NA	1.98	0.71	0.004998
433	16	rs17146023	174169	G/A	0.3016	NA	NA	NA	0.5	-0.18	0.005401
434	16	rs13336077	172025	T/C	0.1614	NA	NA	NA	0.41	-0.15	0.005834
435	6	rs9385715	135454385	T/C	0.1436	NA	NA	NA	0.43	-0.16	0.005851
436	6	rs9321490	135494875	C/T	0.2672	NA	NA	NA	0.5	-0.18	0.005964
437	6	rs5880245	135452438	T/TA	0.3972	NA	NA	NA	0.35	-0.13	0.006023
438	6	1900-02-01 02:28:00	135312172	G/GA	0.2934	HBS1L	q23.3	benign	2.69	0.98	0.006066
439	6	1900-01-04 16:13:00	135534821	T/A	0.03175	MYB	q23.3	benign	0.18	-0.06	0.006223
440	6	rs111659434	135428759	A/G	0.03175	NA	NA	NA	0.18	-0.06	0.006223
441	6	rs112510126	135425015	T/G	0.03175	NA	NA	NA	0.18	-0.06	0.006223
442	6	rs9385719	135524516	A/G	0.4037	NA	NA	NA	1.99	0.73	0.006442
443	6	rs114071504	135527037	A/G	0.09788	NA	NA	NA	5.4	2	0.006785
444	6	rs1569534	135451580	T/C	0.172	NA	NA	NA	0.47	-0.17	0.007011
445	6	rs4895440	135426558	T/A	0.3995	NA	NA	NA	1.93	0.72	0.007112
446	2	rs45484694	60711027	CT/C	0.266	NA	NA	NA	2.27	0.85	0.007292
447	6	1900-02-12 19:43:00	135460119	*/T	0.138	HBS1L,MYB			0.41	-0.15	0.00737
448	6	rs2078213	135458071	C/T	0.1587	NA	NA	NA	0.45	-0.17	0.007552
449	6	rs2223385	135435171	A/G	0.4259	NA	NA	NA	0.54	-0.2	0.007615
450	6	rs9389270	135431807	T/C	0.1111	NA	NA	NA	0.41	-0.16	0.007655
451	6	1900-01-12 02:34:00	135348914	ATTT/AT	0.3125	HBS1L	q23.3	benign	3.22	1.21	0.007812
452	16	rs13331107	174410	G/A	0.164	NA	NA	NA	0.43	-0.16	0.007822
453	16	rs17146027	174743	C/T	0.164	NA	NA	NA	0.43	-0.16	0.007822
454	6	rs9389271	135433404	T/C	0.4176	NA	NA	NA	0.54	-0.2	0.008094
455	6	rs9376095	135450755	C/T	0.1667	NA	NA	NA	0.46	-0.18	0.008311
456	6	1900-02-14 00:11:00	135527363	TAATAATAAT/AAATAATAAT	0.4188	MYB	q23.3	benign	0.52	-0.2	0.008442
457	6	rs17064262	135465474	C/T	0.2169	NA	NA	NA	2.39	0.91	0.008605
458	6	1900-01-20 03:52:00	135294976	GA/GAA	0.4108	HBS1L	q23.3	benign	3.13	1.19	0.008782
459	6	rs9389272	135459837	A/G	0.1508	NA	NA	NA	2.94	1.12	0.008836
460	16	rs13336074	172016	T/C	0.1878	NA	NA	NA	0.46	-0.18	0.00902
461	6	rs79571224	135495432	G/A	0.1032	NA	NA	NA	4.15	1.61	0.009853
462	2	1900-01-16 11:13:00	60775465	CTTT/CTTTT	0.2778	BCL11A	p16.1	pathogenic	0.18	-0.07	0.01002
463	6	rs79004481	135480092	T/C	0.09259	NA	NA	NA	4.98	1.93	0.01009
464	6	1900-02-06 09:55:00	135450891	GTT/GT	0.1622	HBS1L,MYB			0.47	-0.18	0.01064
465	6	1899-12-31 07:05:00	135397441	*/T	0.06461	HBS1L,MYB			0.36	-0.14	0.01138
466	6	rs10080326	135400119	G/A	0.07407	NA	NA	NA	0.36	-0.14	0.0121
467	6	rs9494138	135407586	A/G	0.07407	NA	NA	NA	0.36	-0.14	0.0121
468	6	rs76899322	135469506	A/G	0.08995	NA	NA	NA	4.77	1.91	0.01231
469	6	rs61738647	135282735	C/T	0.1667	NA	NA	NA	2.59	1.04	0.01265
470	6	rs11960991	135476551	A/G	0.2037	NA	NA	NA	2.29	0.92	0.01313
471	6	rs9385716	135455329	G/A	0.209	NA	NA	NA	0.53	-0.21	0.01317
472	2	1900-01-13 02:42:00	60705098	*/T	0.104	BCL11A	p16.1	pathogenic	0.38	-0.15	0.0137
473	6	rs182432365	135389474	A/G	0.03175	NA	NA	NA	0.22	-0.09	0.01389
474	6	rs200898299	135363962	A/AACAAAAAAAAAAAAC	0.2939	NA	NA	NA	2.22	0.9	0.01409
475	6	rs112921369	135344574	G/T	0.02957	NA	NA	NA	0.2	-0.08	0.01437
476	6	rs7775140	135491487	G/A	0.4418	NA	NA	NA	1.82	0.74	0.01442
477	2	rs75883866	60743626	A/G	0.0291	NA	NA	NA	0.2	-0.08	0.01468
478	6	1900-01-20 00:42:00	135294786	C/T	0.0291	HBS1L	q23.3	benign	0.2	-0.08	0.01468
479	6	rs113090468	135451796	C/A	0.0291	NA	NA	NA	0.2	-0.08	0.01468
480	6	rs113245566	135393954	C/T	0.0291	NA	NA	NA	0.2	-0.08	0.01468
481	6	rs139391134	135517937	G/C	0.0291	NA	NA	NA	0.2	-0.08	0.01468
482	6	rs143206382	135517994	G/A	0.0291	NA	NA	NA	0.2	-0.08	0.01468
483	6	rs147692392	135527556	T/C	0.0291	NA	NA	NA	0.2	-0.08	0.01468
484	6	rs147982245	135530422	G/A	0.0291	NA	NA	NA	0.2	-0.08	0.01468
485	6	rs35697718	135323961	G/C	0.0291	NA	NA	NA	0.2	-0.08	0.01468
486	6	rs76029016	135352135	C/T	0.0291	NA	NA	NA	0.2	-0.08	0.01468
487	6	1900-02-12 19:44:00	135460120	*/T	0.1189	HBS1L,MYB			0.42	-0.17	0.01469
488	6	rs1411919	135432061	G/A	0.3995	NA	NA	NA	0.57	-0.23	0.01469
489	6	rs28449450	135439275	C/T	0.0873	NA	NA	NA	4.57	1.88	0.01501
490	6	rs55732099	135434782	T/C	0.0873	NA	NA	NA	4.57	1.88	0.01501
491	16	rs2541610	177002	A/T	0.1296	NA	NA	NA	0.45	-0.19	0.01692
492	6	rs1041479	135488496	T/C	0.4615	NA	NA	NA	1.74	0.73	0.01726
493	6	rs6924687	135467521	A/T	0.2063	NA	NA	NA	2.2	0.93	0.01782
494	11	rs6578596	5295631	G/A	0.01587	NA	NA	NA	0.07	-0.03	0.01826
495	6	1900-01-04 20:55:00	135469567	G/GA	0.01587	HBS1L,MYB			0.07	-0.03	0.01826
496	2	rs1427407	60718043	T/G	0.2302	NA	NA	NA	2.07	0.88	0.0186
497	6	rs7762830	135523774	A/G	0.3492	NA	NA	NA	1.86	0.79	0.01893
498	6	rs10872428	135491872	T/G	0.1561	NA	NA	NA	0.52	-0.22	0.01934
499	6	rs1135205	135281795	C/T	0.4188	NA	NA	NA	0.64	-0.28	0.0194
500	6	rs9494167	135489069	T/C	0.4388	NA	NA	NA	1.75	0.75	0.0194
501	6	rs9494137	135403971	C/T	0.05793	NA	NA	NA	0.33	-0.14	0.0196
502	6	rs12191243	135446826	G/C	0.127	NA	NA	NA	0.49	-0.21	0.02046
503	6	rs9494141	135430299	C/T	0.1685	NA	NA	NA	2.18	0.95	0.02163
504	6	rs7745289	135380327	G/A	0.1799	NA	NA	NA	2.28	0.99	0.02171
505	6	rs4896120	135293512	C/G	0.1534	NA	NA	NA	0.51	-0.22	0.02306
506	6	rs7773126	135318390	A/G	0.1534	NA	NA	NA	0.51	-0.22	0.02306
507	2	rs7593947	60704933	A/T	0.1931	NA	NA	NA	2.16	0.95	0.02348
508	6	rs11758774	135383789	G/T	0.1667	NA	NA	NA	2.31	1.03	0.02483
509	6	rs56316290	135485498	A/G	0.206	NA	NA	NA	2.07	0.92	0.02483
510	6	1900-01-28 21:33:00	135504165	*/TTCG	0.01437	MYB	q23.3	benign	0.08	-0.04	0.02577
511	2	1900-02-13 18:48:00	60685168	C/CT	0.0604	BCL11A	p16.1	pathogenic	0.33	-0.15	0.02597
512	6	rs7775698	135418635	T/C	0.1611	NA	NA	NA	0.5	-0.22	0.02656
513	6	1900-02-07 22:04:00	135453060	CAAAA/CAAAAAAAAAAAAAAAAAAAA	0.0493	HBS1L,MYB			0.36	-0.16	0.02703
514	6	1900-02-04 23:46:00	135383306	A/AT	0.05556	HBS1L,MYB			0.34	-0.16	0.02721
515	6	rs61738492	135282771	A/G	0.2328	NA	NA	NA	1.97	0.89	0.0276
516	6	1900-02-12 19:41:00	135460117	CTTTT/CTTTTTT	0.1129	HBS1L,MYB			0.35	-0.16	0.02791
517	6	rs2026310	135465551	C/A	0.4894	NA	NA	NA	0.58	-0.27	0.02894
518	6	rs2327586	135495226	C/T	0.3307	NA	NA	NA	1.81	0.83	0.02899
519	6	rs11759062	135381248	C/A	0.1852	NA	NA	NA	2.13	0.99	0.03093
520	6	rs6900070	135443604	T/C	0.2751	NA	NA	NA	1.81	0.84	0.03201
521	6	1900-01-22 13:23:00	135363963	*/ACAAAAAAAAAAAAC	0.1978	HBS1L	q23.3	benign	2.37	1.11	0.03255
522	11	rs111978456	5311492	G/GC	0.06614	NA	NA	NA	0.41	-0.19	0.03289
523	16	rs35555273	173714	G/C	0.06085	NA	NA	NA	0.38	-0.18	0.03352
524	2	rs113995950	60706229	C/T	0.03704	NA	NA	NA	0.31	-0.15	0.03359
525	6	rs4896131	135392100	C/A	0.3107	NA	NA	NA	0.62	-0.29	0.0339
526	6	rs111870406	135444149	A/G	0.2831	NA	NA	NA	1.79	0.84	0.03435
527	6	rs55981133	135443843	C/G	0.2831	NA	NA	NA	1.79	0.84	0.03435
528	6	rs56267938	135446469	G/A	0.2831	NA	NA	NA	1.79	0.84	0.03435
529	6	rs138509287	135420386	A/C	0.02646	NA	NA	NA	0.24	-0.12	0.03464
530	6	rs6569997	135461134	T/C	0.4683	NA	NA	NA	0.58	-0.28	0.03578
531	6	rs7740945	135461866	A/C	0.4683	NA	NA	NA	0.58	-0.28	0.03578
532	6	rs35367489	135344455	A/G	0.1649	NA	NA	NA	2.15	1.02	0.03581
533	11	rs72872557	5314359	C/T	0.01323	NA	NA	NA	0.09	-0.04	0.03584
534	2	rs144395176	60709900	T/C	0.01323	NA	NA	NA	0.09	-0.04	0.03584
535	6	rs116460276	135407493	G/A	0.01323	NA	NA	NA	0.09	-0.04	0.03584
536	6	rs148826327	135399356	A/G	0.01323	NA	NA	NA	0.09	-0.04	0.03584
537	6	rs149496650	135348223	A/G	0.01323	NA	NA	NA	0.09	-0.04	0.03584
538	2	rs11692396	60710738	G/A	0.254	NA	NA	NA	1.8	0.86	0.03636
539	6	rs7768809	135450899	G/T	0.1561	NA	NA	NA	2.17	1.04	0.0367
540	6	rs2050019	135463947	T/C	0.4841	NA	NA	NA	0.6	-0.29	0.03704
541	6	1900-01-13 02:41:00	109004889	CAAA/CAAAA	0.4449	FOXO3	q21	benign	2.82	1.36	0.03794
542	6	rs4896127	135345459	A/T	0.1196	NA	NA	NA	2.56	1.23	0.038
543	6	rs210938	135537897	G/A	0.3598	NA	NA	NA	0.63	-0.3	0.03892
544	2	rs113671572	60680796	T/C	0.06085	NA	NA	NA	4.79	2.32	0.03896
545	6	rs9376097	135479677	C/T	0.1534	NA	NA	NA	2.16	1.05	0.03994
546	6	1900-01-28 21:34:00	135504166	*/TCG	0.01748	MYB	q23.3	benign	0.1	-0.05	0.04094
547	6	rs210939	135537890	G/C	0.3148	NA	NA	NA	0.63	-0.31	0.04204
548	6	rs6909822	135463333	A/G	0.4603	NA	NA	NA	0.6	-0.29	0.04214
549	6	rs743589	135522939	T/C	0.3651	NA	NA	NA	1.68	0.83	0.04281
550	6	rs35554774	135449350	G/GAA	0.35	NA	NA	NA	0.5	-0.25	0.04309
551	6	rs9402691	135487502	C/G	0.2354	NA	NA	NA	0.59	-0.29	0.04327
552	6	rs9376096	135469752	T/C	0.4841	NA	NA	NA	0.62	-0.31	0.04374
553	6	rs1883355	135461937	G/A	0.4709	NA	NA	NA	0.6	-0.3	0.04383
554	6	rs36006349	135346639	C/CAA	0.246	NA	NA	NA	0.58	-0.29	0.04421
555	11	rs7130110	5296104	C/G	0.02116	NA	NA	NA	0.22	-0.11	0.04501
556	6	rs55954464	135443931	C/T	0.2566	NA	NA	NA	1.78	0.89	0.04546
557	6	rs11759077	135381351	G/A	0.1799	NA	NA	NA	2.01	1.01	0.04594
558	11	1900-01-29 23:15:00	5285375	CA/CAA	0.4371	HBG2,HBE1			0.22	-0.11	0.04659
559	11	rs145843585	5321510	CAGG/C	0.06878	NA	NA	NA	0.44	-0.22	0.04669
560	6	rs55875437	135467188	T/C	0.4101	NA	NA	NA	1.65	0.83	0.04717
561	6	1900-02-06 22:47:00	135320591	C/T	0.02469	HBS1L	q23.3	benign	0.23	-0.11	0.04741
562	6	rs7751525	135463708	G/A	0.4127	NA	NA	NA	1.61	0.82	0.04896
563	16	rs79737174	172646	C/A	0.06878	NA	NA	NA	3.49	1.78	0.04957
564	6	1900-02-14 03:14:00	135330938	ATT/ATTT	0.3611	HBS1L	q23.3	benign	1.91	0.98	0.04999
565	Logistic association test of the hemolytic SCA samples
566	CHR	SNP	BP	A1/A2	MAF	Gene	Band	Clinical	OR	SE	P
567	6	rs138509287	135420386	A/C	0.02646	NA	NA	NA	10.19	3.01	0.0006972
568	6	1900-02-04 23:46:00	135383306	A/AT	0.05556	HBS1L,MYB			5.62	1.78	0.001574
569	6	rs55875437	135467188	T/C	0.4101	NA	NA	NA	0.27	-0.09	0.002258
570	6	rs150439252	135429366	T/G	0.02381	NA	NA	NA	8.39	2.83	0.003014
571	6	rs9494154	135468005	T/A	0.4048	NA	NA	NA	0.28	-0.09	0.003055
572	6	rs7751525	135463708	G/A	0.4127	NA	NA	NA	0.29	-0.1	0.003132
573	6	rs9402681	135397301	G/T	0.1711	NA	NA	NA	3.4	1.16	0.003394
574	6	1900-02-03 06:53:00	135511925	AT/A	0.02646	MYB	q23.3	benign	6.93	2.4	0.003929
575	6	rs148494937	135452082	A/G	0.02646	NA	NA	NA	6.93	2.4	0.003929
576	6	rs149751423	135482370	C/T	0.02646	NA	NA	NA	6.93	2.4	0.003929
577	6	rs151167914	135493193	C/T	0.02646	NA	NA	NA	6.93	2.4	0.003929
578	6	rs76362969	135454629	A/G	0.02646	NA	NA	NA	6.93	2.4	0.003929
579	6	1900-02-01 02:28:00	135312172	G/GA	0.2934	HBS1L	q23.3	benign	0.18	-0.06	0.004429
580	6	rs78243357	135368016	T/A	0.01562	NA	NA	NA	15.11	5.31	0.004464
581	6	1900-01-14 12:17:00	135286841	A/G	0.01323	HBS1L	q23.3	benign	13.83	4.98	0.005486
582	6	1900-02-01 17:52:00	135378632	T/C	0.01323	HBS1L,MYB			13.83	4.98	0.005486
583	6	rs139611567	135482343	C/T	0.01323	NA	NA	NA	13.83	4.98	0.005486
584	6	rs200327611	135323959	A/G	0.01323	NA	NA	NA	13.83	4.98	0.005486
585	6	rs73555746	135521489	C/A	0.01323	NA	NA	NA	13.83	4.98	0.005486
586	2	1900-01-04 13:02:00	60758294	T/G	0.01337	BCL11A	p16.1	pathogenic	13.67	4.95	0.005708
587	6	rs56735271	135489006	C/T	0.03968	NA	NA	NA	4.94	1.88	0.008554
588	11	rs6578596	5295631	G/A	0.01587	NA	NA	NA	9.17	3.53	0.009426
589	6	rs114298899	135524449	T/C	0.01587	NA	NA	NA	9.17	3.53	0.009426
590	6	rs10872428	135491872	T/G	0.1561	NA	NA	NA	2.49	0.96	0.009518
591	6	rs5880245	135452438	T/TA	0.3972	NA	NA	NA	3.82	1.49	0.01016
592	6	1900-01-28 09:45:00	135372385	GA/G	0.01622	HBS1L	q23.3	benign	8.94	3.48	0.01025
593	6	rs148916456	135345195	C/T	0.01648	NA	NA	NA	8.78	3.45	0.01093
594	6	rs111524707	135438971	T/C	0.04762	NA	NA	NA	3.55	1.41	0.01201
595	6	rs116338436	135336055	G/C	0.02116	NA	NA	NA	6.13	2.45	0.01253
596	2	rs75883866	60743626	A/G	0.0291	NA	NA	NA	5.41	2.17	0.01258
597	6	rs116218808	135432067	T/C	0.0291	NA	NA	NA	5.41	2.17	0.01258
598	6	rs145265805	135447753	A/C	0.0291	NA	NA	NA	5.41	2.17	0.01258
599	6	rs150316070	135448876	A/C	0.0291	NA	NA	NA	5.41	2.17	0.01258
600	6	rs9389263	135400565	G/A	0.08466	NA	NA	NA	3.26	1.31	0.01265
601	6	rs73555724	135491527	C/G	0.04233	NA	NA	NA	4.46	1.79	0.01268
602	6	rs74370255	135344201	A/G	0.02139	NA	NA	NA	6.06	2.44	0.01296
603	6	rs210939	135537890	G/C	0.3148	NA	NA	NA	2.17	0.88	0.01351
604	11	1900-01-17 15:59:00	5267659	G/GA	0.03107	BGLT3	p15.4		5.36	2.17	0.01354
605	6	rs115871601	135458906	T/C	0.05291	NA	NA	NA	3.66	1.48	0.01367
606	6	rs949895	135405359	C/T	0.1005	NA	NA	NA	2.94	1.2	0.01414
607	6	1900-02-12 11:47:00	135459643	CA/CAA	0.4769	HBS1L,MYB			0.2	-0.08	0.01424
608	2	1900-01-07 02:38:00	60696454	A/AG	0.01852	BCL11A	p16.1	pathogenic	6.83	2.86	0.01671
609	6	rs111851432	135323837	C/G	0.01852	NA	NA	NA	6.83	2.86	0.01671
610	6	rs73555742	135518108	C/T	0.04497	NA	NA	NA	4.06	1.72	0.01818
611	6	rs1074849	135423412	A/G	0.1534	NA	NA	NA	2.4	1.02	0.01887
612	6	rs1883354	135457541	A/G	0.1772	NA	NA	NA	2.47	1.06	0.0195
613	6	rs116496659	135449212	A/G	0.03175	NA	NA	NA	4.71	2.02	0.01956
614	6	rs9402691	135487502	C/G	0.2354	NA	NA	NA	2.28	0.99	0.02133
615	6	1900-01-10 00:03:00	135345883	T/TTAAGA	0.02454	HBS1L	q23.3	benign	6.04	2.63	0.02146
616	16	rs183984340	175649	T/C	0.007937	NA	NA	NA	17.58	7.66	0.02166
617	6	rs75844714	135425131	A/C	0.03243	NA	NA	NA	4.59	2	0.02167
618	6	rs147760667	135468228	A/T	0.05172	NA	NA	NA	3.39	1.48	0.02182
619	6	rs2078213	135458071	C/T	0.1587	NA	NA	NA	2.42	1.05	0.02204
620	6	1900-01-13 04:56:00	109005024	TT/AT	0.008021	FOXO3	q21	benign	17.37	7.6	0.02222
621	6	rs6924521	135467415	T/C	0.09259	NA	NA	NA	2.89	1.28	0.02372
622	6	rs6929368	135467725	T/A	0.09259	NA	NA	NA	2.89	1.28	0.02372
623	11	rs12286811	5270004	G/A	0.3069	NA	NA	NA	3.69	1.64	0.024
624	6	1900-01-05 03:01:00	135535469	GA/GAA	0.2321	MYB	q23.3	benign	0.28	-0.12	0.02455
625	6	1900-01-17 23:48:00	135488460	A/AAAAAAG	0.1013	HBS1L,MYB			3.19	1.42	0.02462
626	6	1900-01-03 22:34:00	135468226	AATAT/AAT	0.08333	HBS1L,MYB			3.65	1.65	0.02689
627	6	1899-12-31 18:51:00	135529219	ATTTT/ATTT	0.3509	MYB	q23.3	benign	10.87	4.91	0.02692
628	6	rs210938	135537897	G/A	0.3598	NA	NA	NA	2.04	0.92	0.02747
629	6	rs77014212	135389753	T/C	0.209	NA	NA	NA	2.45	1.12	0.02809
630	11	rs7130110	5296104	C/G	0.02116	NA	NA	NA	5.43	2.48	0.02822
631	6	1900-02-02 08:11:00	135445027	AACAACAGCAAAAAACTGTGTGATATGCTCCCAGCCCTTAAAGGG/A	0.02116	HBS1L,MYB			5.43	2.48	0.02822
632	6	rs1331308	135405122	A/C	0.09524	NA	NA	NA	2.79	1.27	0.02878
633	6	rs9483783	135401040	C/T	0.1138	NA	NA	NA	2.71	1.24	0.02911
634	11	rs11036571	5295644	G/T	0.04497	NA	NA	NA	3.34	1.54	0.02954
635	11	rs11036574	5295774	T/C	0.04497	NA	NA	NA	3.34	1.54	0.02954
636	2	1900-02-12 01:45:00	60748241	CCA/CACA	0.1607	BCL11A	p16.1	pathogenic	3.01	1.39	0.02971
637	6	rs55654242	135477987	A/T	0.3915	NA	NA	NA	0.43	-0.2	0.0309
638	6	rs743589	135522939	T/C	0.3651	NA	NA	NA	0.42	-0.19	0.03116
639	11	1900-02-07 10:42:00	5297582	C/A	0.01639	HBE1,OR51B4			5.59	2.61	0.03226
640	6	rs7765438	135477337	A/G	0.1349	NA	NA	NA	2.61	1.22	0.03298
641	6	rs62429812	135480147	G/T	0.1799	NA	NA	NA	0.21	-0.1	0.0336
642	6	rs6920829	135519500	C/T	0.2249	NA	NA	NA	0.31	-0.14	0.03365
643	6	rs78870638	135437755	GT/GTT	0.4724	NA	NA	NA	0.19	-0.09	0.03373
644	6	rs12205603	135500087	C/G	0.2619	NA	NA	NA	2.04	0.96	0.034
645	6	rs7758845	135428537	C/A	0.3995	NA	NA	NA	0.46	-0.22	0.03425
646	6	rs12191243	135446826	G/C	0.127	NA	NA	NA	2.27	1.07	0.03474
647	11	rs11036683	5325005	C/A	0.01058	NA	NA	NA	8.74	4.15	0.03515
648	2	1900-01-19 18:27:00	60780219	T/C	0.01058	BCL11A	p16.1	pathogenic	8.74	4.15	0.03515
649	6	rs7775544	135293889	A/T	0.01058	NA	NA	NA	8.74	4.15	0.03515
650	2	rs1427407	60718043	T/G	0.2302	NA	NA	NA	0.32	-0.15	0.0355
651	6	rs9376095	135450755	C/T	0.1667	NA	NA	NA	2.2	1.05	0.03582
652	11	rs4390373	5249732	G/A	0.0125	NA	NA	NA	8.75	4.17	0.03597
653	2	rs146481566	60755943	G/GTAA	0.2275	NA	NA	NA	2.14	1.02	0.03605
654	2	rs79059225	60755762	T/C	0.2275	NA	NA	NA	2.14	1.02	0.03605
655	6	1900-01-06 08:41:00	135406177	GTTTTTG/TTTTTTG	0.0452	HBS1L,MYB			2.24	1.07	0.03624
656	2	rs140011420	60764430	G/A	0.01075	NA	NA	NA	8.58	4.11	0.03672
657	6	rs6920211	135431318	C/T	0.3968	NA	NA	NA	0.46	-0.22	0.03775
658	6	rs9389270	135431807	T/C	0.1111	NA	NA	NA	2.32	1.12	0.03789
659	6	rs35959442	135424179	G/C	0.3942	NA	NA	NA	0.46	-0.23	0.03945
660	11	rs7928386	5297583	A/C	0.01913	NA	NA	NA	4.61	2.24	0.03962
661	6	rs113909655	135524520	T/TTGG	0.4548	NA	NA	NA	0.47	-0.23	0.03979
662	6	rs9321490	135494875	C/T	0.2672	NA	NA	NA	2	0.97	0.04064
663	6	rs62429811	135480054	C/T	0.164	NA	NA	NA	0.22	-0.11	0.04203
664	6	1900-02-13 10:41:00	135395481	CT/CTT	0.274	HBS1L,MYB			2.96	1.46	0.04304
665	6	rs9373124	135423209	C/T	0.4947	NA	NA	NA	0.52	-0.26	0.0434
666	6	rs17064262	135465474	C/T	0.2169	NA	NA	NA	0.33	-0.16	0.04466
667	6	1900-01-11 19:02:00	135282926	CACCCATAGACCCCAGTGGTGTGCAGT/C	0.02381	HBS1L	q23.3	benign	4.5	2.24	0.04477
668	6	rs115040208	135463904	A/G	0.02381	NA	NA	NA	4.5	2.24	0.04477
669	6	rs139331616	135461414	A/G	0.02381	NA	NA	NA	4.5	2.24	0.04477
670	6	rs140526737	135388718	T/G	0.02381	NA	NA	NA	4.5	2.24	0.04477
671	6	rs78022260	135352562	G/A	0.02381	NA	NA	NA	4.5	2.24	0.04477
672	6	rs1986846	135481885	A/T	0.2143	NA	NA	NA	0.33	-0.16	0.04535
673	6	rs6922903	135507394	C/T	0.2937	NA	NA	NA	0.41	-0.21	0.04727
674	6	rs12203816	135529561	T/C	0.393	NA	NA	NA	1.85	0.93	0.04755
675	6	rs2050020	135464053	A/G	0.1005	NA	NA	NA	2.42	1.22	0.0481
676	11	rs112075505	5276402	TTTAAAG/T	0.05026	NA	NA	NA	2.93	1.48	0.04838
677	2	rs72964457	60777216	A/G	0.1561	NA	NA	NA	2.2	1.12	0.04845
678	11	rs374092925	5225903	*/T	0.1771	NA	NA	NA	2.02	1.02	0.04886
679	6	rs9385716	135455329	G/A	0.209	NA	NA	NA	1.97	1	0.0492
680	6	rs1569534	135451580	T/C	0.172	NA	NA	NA	2.06	1.05	0.04929
681	11	rs112035597	5277116	G/A	0.05053	NA	NA	NA	2.91	1.48	0.04956
682	11	rs113981422	5277117	C/A	0.05053	NA	NA	NA	2.91	1.48	0.04956
